# Supplementary material for: Analysis of the technical biases of meteor video cameras used in the CILBO system
Source: Copernicus journal article supplement (doi:10.5194/gi-2016-30), 2016-10-24
Supplement: Supplementary file [file gi-2016-30-AC1-supplement.pdf]

# 1 **Analysis of the technical biases of meteor video cameras**

## 2 **used in the CILBO system**

3 **Thomas Albin**<sup>(1), (2)</sup>, **Detlef Koschny**<sup>(3), (4)</sup>, **Sirko Molau**<sup>(5)</sup>, **Ralf Srama**<sup>(1)</sup> and **Björn**  
4 **Poppe**<sup>(2)</sup>

5(1) Institute of Space Systems, University of Stuttgart, Pfaffenwaldring 29, 70569 Stuttgart,  
6Germany

7(2) Universitätssternwarte Oldenburg, Institute of Physics and Department of Medical Physics  
8and Acoustics, Carl von Ossietzky University, 26129 Oldenburg, Germany

9(3) European Space Agency, ESA/ESTEC, Keplerlaan 1, 2201 AZ Noordwijk ZH,  
10Netherlands

11(4) Chair of Astronautics, Technical Univ. Munich, Boltzmannstraße 15, 85748 Garching,  
12Germany

13(5) International Meteor Organisation, Abenstalstr. 13b, 84072 Seysdorf, Germany

14

15Correspondence to: T. Albin (albin@irs.uni-stuttgart.de)

16

### 171 **Abstract**

18In this paper, we analyze the technical biases of two intensified video cameras, ICC7 and  
19ICC9 of the double-station meteor camera system CILBO (Canary Island Long-Baseline  
20Observatory). This is done to thoroughly understand the effects of the camera systems on the  
21scientific data analysis. We expect a number of errors or biases that come from the system:  
22Instrumental errors, algorithmic errors, and statistical errors. We analyze different  
23observational properties, in particular the detected meteor magnitudes, apparent velocities,  
24estimated goodness-of-fit of the astrometric measurements w.r.t. a great circle, and the  
25distortion of the camera.

26We find that due to a loss of sensitivity towards the edges, the cameras detect only about 55  
27% of the meteors it could detect if it had a constant sensitivity. This detection efficiency is a  
28function of the apparent meteor velocity.

1 We analyze the optical distortion of the system and the 'goodness-of-fit' of individual meteor  
2 position measurements relative to a fitted great circle. The astrometric error is dominated by  
3 uncertainties in the measurement of the meteor attributed to blooming, distortion of the  
4 meteor image, and the development of a wake for some meteors. The distortion of the video  
5 images can be neglected.

6 We compare the results of the two identical camera systems and find systematic differences.  
7 For example, the peak magnitude distribution for ICC9 is shifted by about 0.2-0.4 mag  
8 towards fainter magnitudes. This can be explained by the different pointing directions of the  
9 cameras. Since both cameras monitor the same volume in the atmosphere roughly between the  
10 two islands of Tenerife and La Palma, one camera (ICC7) is pointing towards the West, the  
11 other one (ICC9) the East. In particular, in the morning hours the Apex source is close to the  
12 field-of-view of ICC9. Thus, these meteors appear slower, increasing the dwell time on a  
13 pixel. This is favorable for the detection of a meteor of a given magnitude.

## 142 **Overview and scientific objectives**

15 Recently, several multi-station video camera systems to observe meteors have been set up,  
16 among others, in Japan (SonotaCo, et al. 2010, in Canada (Weryk et al. 2013) and in the US  
17 (Cooke and Moser 2012, Jenniskens et al. 2011). The Canary Island Long-Baseline  
18 Observatory CILBO is a double-station meteor camera setup operated by the Meteor Research  
19 Group of the European Space Agency. It is part of the video camera system of the  
20 International Meteor Organisation (Molau et al. 2015). CILBO consists of two stations, one  
21 on Tenerife and one on La Palma. A small building with an automated roll-off roof houses a  
22 set of video cameras with image intensifiers that monitor the same volume in the atmosphere  
23 for meteors. The pointing of the cameras is such that their image centers point to a height of  
24 100 km between the two islands. Analyzing the same meteor as seen from both camera  
25 stations allows to derive the position relative to the Earth and, with that, to the cameras.

26 The main scientific goals of the setup are:

27 (a) To study physical and chemical properties of meteoroids, and, taking into account the  
28 modifications of the meteoroid properties during their flight in the solar system, constrain the  
29 physical and chemical properties of their parent body.

30 (b) To study the variability of the background dust flux in the Earth environment during a  
31 complete year.

1 To fulfill these goals, the following measurements are needed: (a) flux densities of the  
2 meteors, derived from the meteor numbers per time; (b) the physical properties of the  
3 meteoroids, and their distribution, derived from light curves and velocity analysis; (c)  
4 meteoroid orbits, derived from the double-station observations; (d) chemical properties of the  
5 meteoroids, derived from spectra of the meteors.

6 A double-station setup is very well suited to address these points. Since the distances of the  
7 meteor to the cameras can be determined, the absolute magnitude and the velocity in m/s can  
8 be computed. From this, the mass of the underlying meteoroid can be estimated (see e.g.  
9 Drolshagen *et al.* 2014, Ott *et al.* 2014, Kretschmer *et al.* 2015). This allows determining the  
10 flux density of meteoroids as a function of mass. From the triangulation of the positions, the  
11 3-d trajectory of the meteoroid in geocentric coordinates is determined. Together with the  
12 velocity, the meteoroid path can be propagated backward and the heliocentric orbit of the  
13 meteoroid can be determined. From the magnitude profile of the meteor some physical  
14 properties of the object can be determined. To measure the spectra of the meteors, a second  
15 camera is installed on Tenerife which has an objective grating.

16 To properly analyze all of these measurements, many biases have to be considered. Meteors  
17 of a given mass will generate more light the higher their velocity when entering the  
18 atmosphere. They will only be detected when they are above a certain brightness, which also  
19 depends on the distance to the observing camera. Because of the optical effects of the camera,  
20 they may be detectable in the center of the field of view but not at the edges, where the  
21 camera sensitivity is lower. The higher the apparent velocity of a meteor, the more pixels are  
22 covered per unit time by the meteor, making it more difficult to detect it. The observing  
23 geometry will affect the observations - as we will show, a camera pointing to the east will  
24 record more meteors than one pointing west. This is because the east-pointing camera sees  
25 meteors from the Apex direction with lower apparent velocity, increasing the dwell time and  
26 thus the meteors signal on a pixel.

27 In general, we distinguish between two effects - physical biases and biases in the detection  
28 system. Physical biases include effects independent from the detection system. For example,  
29 meteors that due to their orbital elements do not intersect with Earth's orbit need to be  
30 estimated for modelling purposes. This paper deals with the latter, the detection system, and  
31 with geometrical aspects. This affects the detectability of meteors and biases the resulting  
32 brightness and velocity distributions depending on the camera system's setup, settings and its

1pointing. The following section gives more background on the technical aspects of the  
2system. We first describe the setup and then summarize all the expected errors.

### 33 Setup, data flow, and methods

#### 43.1 CILBO overview

5A detailed overview of the setup is given in a previous paper (Koschny *et al.* 2013). In this  
6paper, we focus on the camera and the detection system, with an emphasis on their technical  
7performance. Figure 1 shows a photograph and a block diagram of one of the cameras. It  
8consists of the following main elements: (a) An objective lens type Fujinon, 25 mm f/0.8; an  
9image intensifier type DEP1700 with a fibre-coupled 2/3" CCD sensor read out via a Teli  
10CS8310BCi video camera. The resulting field of view is roughly  $28^\circ \times 22^\circ$  (H x V).

11In the following, we are analyzing data from two cameras, called ICC7 (on Tenerife) and  
12ICC9 (on La Palma). 'ICC' stands for Intensified CCD Camera. Both cameras are identical.  
13They point to the same volume in the atmosphere, between the two islands. Thus their  
14pointing azimuth is roughly opposite; the pointing elevation is similar but not quite identical.

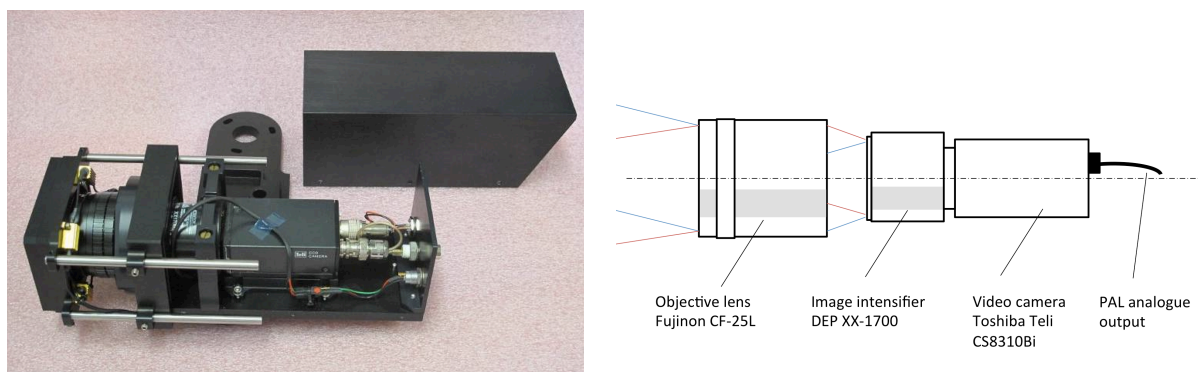

15Figure 1: Photograph and sketch of the video cameras, called ICC (Intensified CCD Camera).

#### 163.2 Data flow

17The video cameras continuously record the night sky. With a field of view of approximately  
18 $600 \text{ deg}^2$ , CILBO covers an area of around  $3000 \text{ km}^2$  at an altitude of 100 km, where most  
19meteors appear. The camera delivers a PAL video stream via a professional frame grabber  
20card (Matrox Meteor II) to a Personal Computer. The video signal is searched in real time for  
21meteors using the software MetRec (Molau 1999). MetRec analyzes down-sampled images  
22with a resolution of  $384 \times 288 \text{ pixel}^2$  and 8 bit dynamical range. Later, we will show both full-  
23resolution data and down-sampled data, depending on the context.

1MetRec generates a background noise image which is subtracted before the detection. The  
2detection algorithm itself is described in Molau (1999, 2014). The software searches for  
3brightness peaks in the background-subtracted images. It checks whether these peaks move on  
4a great circle from one frame to the next.

5For each frame of a detection, MetRec records the total digital number of the event on the  
6detector and the position of its photometric center. For each detected event, it stores a sum  
7image, an animation of the event, and a file containing detailed information on the event.

8For each night, MetRec saves all files in a daily directory. The data for ICC7 and ICC9 are  
9stored in individual paths. The detailed information of each meteor is saved in an individual  
10ASCII file with the extension \*.inf, henceforth called 'information file'. Additionally, MetRec  
11saves a log file that contains e.g. the used detection parameters, the used reference file which  
12contains the astrometric information of the stars and additional information of a recorded  
13meteor.

14The complete content of an information file is, for each frame where the meteor was detected:  
15frame number, precise time taken from the computer clock, magnitude of the event, position  
16of the photometric center in coordinates relative to the detector and in celestial coordinates,  
17and fitted coordinates as described in the following paragraph. An example information file  
18can be found in Koschny *et al.* (2013).

19In addition to the information for each individual meteor, we use the log file entries in this  
20paper to characterize the system behavior. This file provides additional information for each  
21detected meteor.

22The automated event detection runs every clear night, controlled by a scheduling software as  
23described in Koschny *et al.* (2013). At the end of the night, the data are uploaded to a central  
24server for further processing. On the next day, the data of each night is visually inspected and  
25false detections are deleted. The data are submitted on a monthly basis to the video archive of  
26the International Meteor Observation, where a peer-review process ensures good data quality.  
27All data are available and searchable via the Virtual Meteor Observatory (Barentsen *et al.*  
282008, <http://vmo.imo.net>).

29MetRec allows to manually compare a grabbed image with a star chart to produce a so-called  
30'reference star' file. With this file MetRec can convert the relative positions together with the  
31time of the event to Right Ascension and Declination. The 'referencing' process also generates

1a calibration file to convert pixel values to stellar magnitude. This process is typically done  
2only when the camera pointing has changed.

3MetRec attempts to correct any measurement errors in the position determination. It takes the  
4originally measured Right Ascension and Declination values and fits them to a great circle.  
5The measured points are projected onto this great circle. In a next step, MetRec shifts the  
6points on this great circle to be equally spaced. For longer meteors (>7 frames), MetRec shifts  
7the points to match a distribution following a 2nd order polynomial.

8If a second meteor appears during the same second as a previous one, an additional log entry  
9with the same time stamp is saved. However, the corresponding information file with the  
10astrometric information is overwritten and lost.

### 113.3 Expected errors

#### 123.3.1 Overview

13In the later sections of this paper, we will present some findings on different parameters  
14measured by the system. Then we will draw conclusions on how important the different  
15biases are and which ones can be corrected. In summary, we expect the following errors.

#### 163.3.2 Instrumental errors

17(a) The mechanical / thermal instability of the mounting: Due to thermal effects, the precise  
18pointing position of the camera may change. This is a systematic error affecting the position  
19measurement of the meteor.

20(b) The lens and possibly also the image intensifier generate a drop-off caused by both  
21vignetting and the tangent-effect at larger distances to the center of the field of view. This is a  
22systematic error affecting the detectability of a meteor.

23(c) Due to the projection of the celestial sphere on the flat sensor surface, the system generates  
24distortion which needs to be corrected when computing positions of the meteors. This is  
25corrected by the 3rd-order polynomial 'plate fit' performed during the measurement, however  
26see Section 3.3.3 (c).

27(d) The sensor is read out with 25 frames per second, the readout generates noise. In addition,  
28random noise is generated by the image intensifier. The noise statistics are estimated from a

1sequence of dark frames (no light entering the sensor system). It is a random noise affecting  
2all measurements.

3(e) The pixel resolution of the sensor does not match precisely the pixel format of the used  
4PAL format (768 pixel x 586 pixel) and pixels may be interpolated.

5(f) The sensor is an interline-transfer sensor, i.e. every second physical line on the sensor is  
6masked and used for readout. This and the previous point will reduce the quality of the  
7position determination of the meteor.

8(g) (absolute) timing errors (offset of the computer clock): This is a systematic error that only  
9affects the position, not the velocity. A timing error of 1 s would correspond to a position  
10error in Right Ascension of 1/4'.

11(h) Distortion of the image of a meteor close to the edge of the field of view. This effect is  
12particularly pronounced for bright meteors and it will result in errors in the astrometric  
13position of the meteor.

### 143.3.3 Algorithmic errors

15(a) Wake: During the movement of the meteor it may develop a train, which shifts the  
16photometric center to the opposite direction of the meteor's movement. This effect will result  
17in an apparent change in the velocity of the meteor. Typically, trains develop towards the end  
18of the meteor, so this effect will reduce the perceived speed of the meteor towards the end.

19(b) Blooming: For bright meteors, so-called blooming may occur, i.e. electrons spill over  
20from one pixel to other adjacent pixels. The shift of the photometric center can then go in any  
21direction.

22(c) The image distortion is corrected using a 3rd order polynomial fit. In particular, towards  
23the edges of the field of view, a 3rd order may not be good enough to properly describe the  
24distortion. This will introduce a systematic deviation of the measured positions w.r.t. the real  
25position.

26(d) When determining the position of a meteor, our detection software attempts to fit the  
27positions using a linear or quadratic equation resulting in a constant and linear equation for  
28the velocity, respectively. Due to geometric effects this may not be sufficient to describe the  
29position and causes a deviation between the fit and the actual measured meteor position. The  
30effect is meteor dependent, as it is affected by the length of the meteor in number of frames.

1 Any velocity determination error may be estimated by calculating how the velocity will really  
2 change when crossing the field of view, and how good the quadratic fit is.

3 (e) Meteor begin and end: Since the meteor will start or end at a random time during the  
4 exposure of the first or last frame, taking the photometric center as the position of the meteor  
5 for this frame is not giving correct results. This is a systematic error that only affects the  
6 velocity.

7 (f) Quantization error of position in the information files: The position of a meteor is stored as  
8 a relative position in the frame (from 0 to 1) with an accuracy of three decimal places only.  
9 This corresponds roughly to 0.3 pixel. If meteor positions are recomputed later in the analysis  
10 process this information is used, resulting a quantization of the position. This is a random  
11 error which affects both position and velocity. It is meteor dependent, because meteors with  
12 more frames will be less affected.

### 13 3.3.4 Statistical errors

14 (a) Statistical random error: Both the position and the brightness measurements of a meteor in  
15 an individual frame are affected. This is an error due to the probabilistic nature of the event  
16 and is independent from the used instrument or its settings. It affects both position and  
17 velocity and it can be derived from the accuracy of the meteor fit you are currently  
18 investigating. It is meteor dependent, influenced by the number of frames, meteor brightness,  
19 and possibly velocity.

20 In the following sections, we characterize the camera systems in detail. We give results on  
21 technical aspects related to camera and software (flat field effects, distortion...). We then  
22 present statistics on overall distributions of different meteor characteristics (meteor length,  
23 brightness...). We combine these results and provide, as a result, the means to properly debias  
24 the data from the cameras for scientific analysis.

## 25 4 Results

### 26 4.1 Overview

27 Albin *et al.* (2015a, 2015b) have made a first attempt to analyze a selected number of bias  
28 effects for meteors detected simultaneously with ICC7 and ICC9. Here we expand on this  
29 work and also treat some of the data from the cameras separately. We use data from the  
30 information and the log files.



1The data flow followed the description in Section 2. We have used a total of 51062 and 56951  
2information files and 925 and 913 log files for ICC7 and ICC9, respectively. The analyzed  
3time range was from 13 Sep 2011 until 31 Aug 2015.

4In the following sub-sections, we describe different parameters of the measurements. These  
5will be interpreted in the discussion section.

## 64.2 Camera Sensitivity

7We start by analyzing the detection efficiency of both cameras vs. the apparent meteor  
8velocity in pixels per second. The detection efficiency is defined as the ratio of the  
9theoretically expected number of meteor detections on the CCD vs. the number of actual  
10meteor measurements on the CCD (Albin *et al.* 2015). Due to vignetting and projection  
11effects the cameras have a sensitivity drop to the edges and corners of the CCD. Thus, the  
12number of detections decreases to the edges due to the lower Signal-to-Noise Ratio (SNR) of  
13the meteor, which results in less detections by MetRec. In other words, the detection  
14efficiency would be 1 if a meteor of a given magnitude and velocity had the same SNR over  
15the complete field of view.

16Figure 2 shows the flat field of the ICC7 system. The flat field of ICC9 looks similar. The  
17image is an 8-bit median stack of about 10 individual images, recorded when thin fog  
18provided a rather homogeneous sky background. The gray bar indicates the corresponding  
19normalized brightness. It can be seen that the intensity drops to the edges and corners of the  
20CCD. An optical system with no vignetting or projection effects would lead to a uniformly  
21shaped distribution and a detection efficiency of 1. To compute the theoretically expected  
22number of measurements we take the part on the CCD with the highest detection density and  
23extrapolate this value for the complete CCD. A detailed description can be found in Albin *et*  
24*al.* (2015a), who also computed the detection efficiency for the CILBO system depending on  
25the meteor brightness. They found that the detection efficiency is at around 0.55 for meteors  
26with a brightness down to 4.5 mag and drops down to 0.45 and less for fainter meteors. This  
27means that the meteor cameras detect only half of the meteors which would be possible to  
28detect for an evenly illuminated sensor.

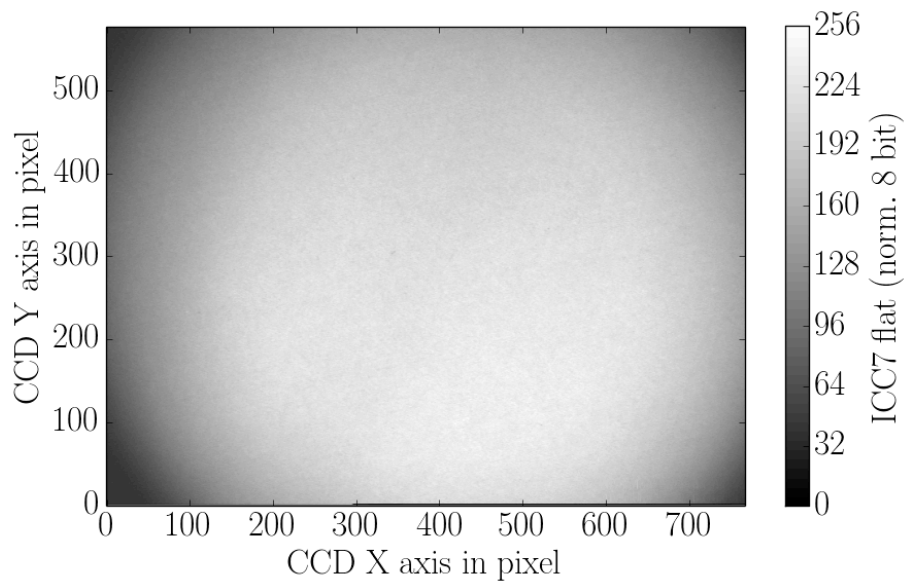

1

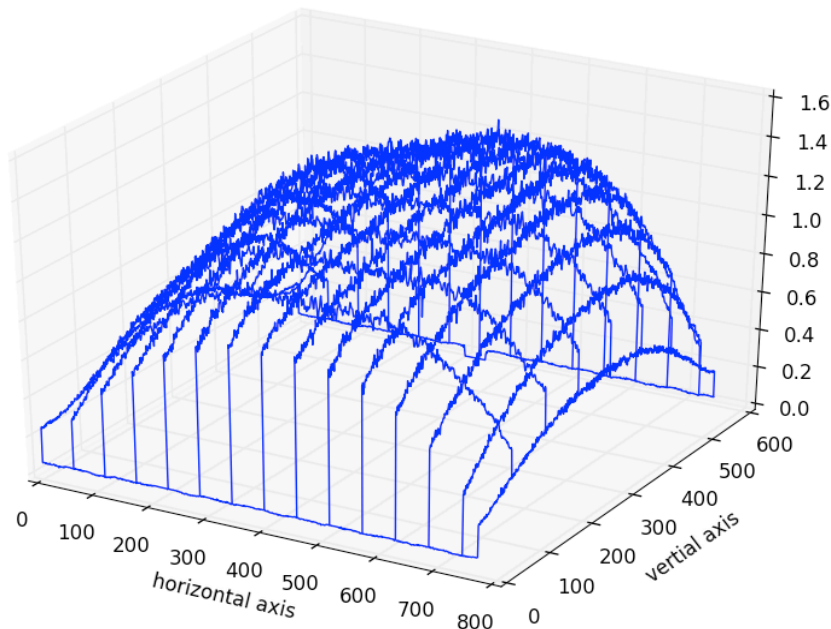

2

3Figure 2 – 8 Bit median flat of the ICC7 camera. The X and Y axis are not down-sampled, they cover the  
4complete PAL signal. On the left, the image is shown, with the color bar indicating the brightness of the  
5flat field. 256 is the maximum and can be found slightly off-centered to the right due to an offset in the  
6optical system. The bottom panel shows a wire-mesh view of the flat field. Normalized values range from  
70.3 in the corners to 1.3 in the middle.

8Figure 3 shows the detection efficiency vs. the meteor velocity in pixels per second. For the  
9analysis, we use the filtered velocity data set from the information files. The data set has been  
10divided into bins of 25 px/s. For each bin, the theoretical and actual number of meteor  
11detections has been computed as in Albin *et al.* (2015a). The plot shows the detection  
12efficiency from 0.0 px/s to 400 px/s. For very large velocities the number of data points

1decreases, increasing the shown standard deviation of the detection efficiency. It can be seen,  
 2that the detection efficiency is between 0.4 and 0.5 for meteors ranging from 0.0 px/s to 200  
 3px/s. Then, the detection efficiency decreases approximately linearly for higher velocities.

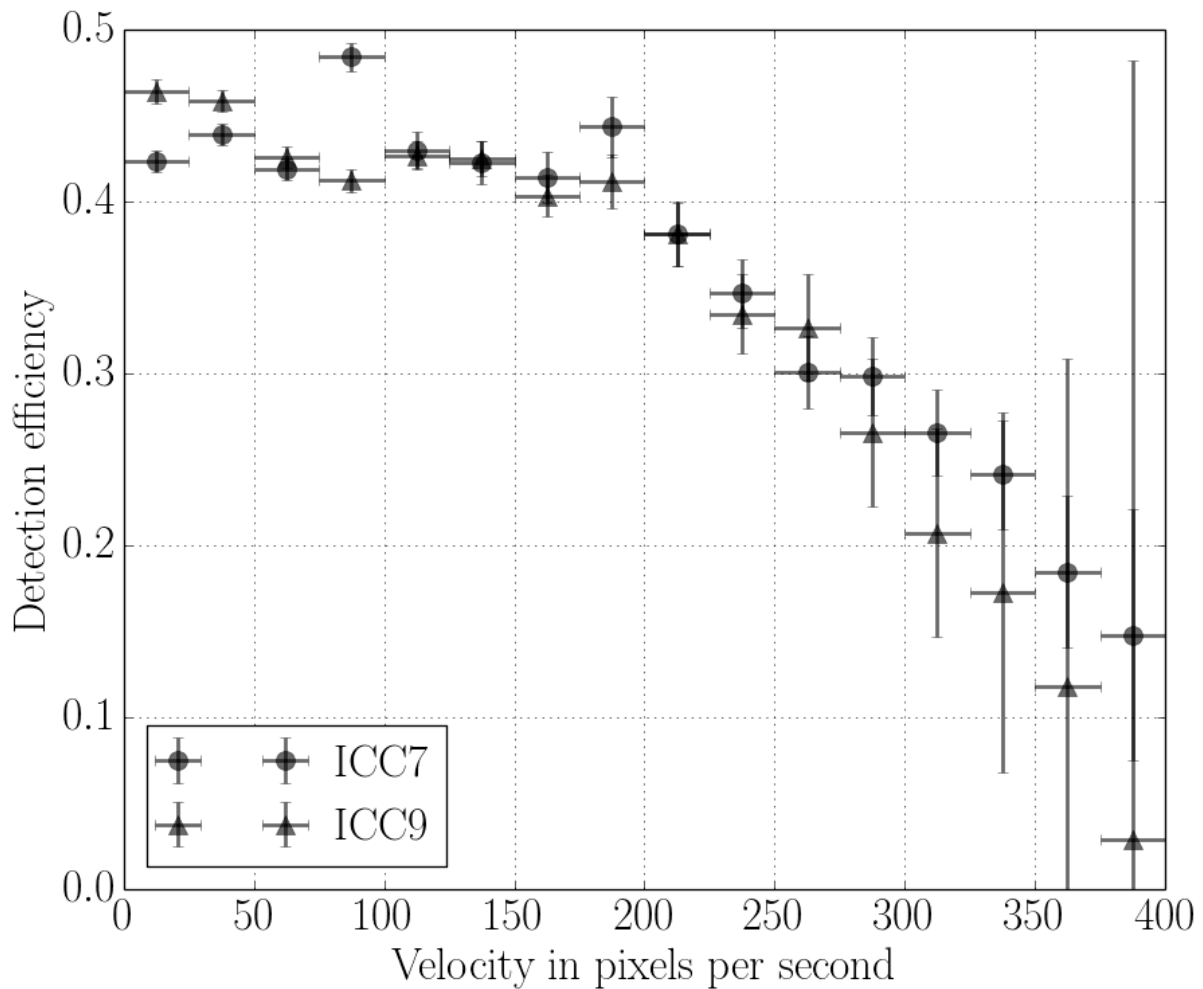

4

5**Figure 3 – Detection efficiency vs. the down-sampled velocity of a meteor in pixels per second. A detailed**  
 6**description of the detection efficiency can be found in Albin *et al.* (2015a).**

7The pixel dwell time of a meteor is inverse proportional to the apparent meteor velocity on the  
 8CCD. Consequently, a higher meteor velocity decreases the SNR for a given meteor  
 9magnitude. The decreasing sensitivity to the edges and corners due to the projection effects  
 10result in a smaller effective detection area on the CCD for higher-velocity meteors. This can  
 11explain the lower detection efficiency for fast meteors.

12The shown effects and the detection efficiency function as shown in Albin *et al.* (2015a) are  
 13necessary to de-bias the mass distribution of the meteors that is correlated to the brightness  
 14measurements. Additionally, the determined flux needs to be corrected by at least a factor of  
 152.

### 14.3 Meteor velocity measurement bias

2Albin *et al.* (2015b) described the velocity profiles of several simultaneously detected meteors  
3with the CILBO camera set-up. For the analysis they used the geocentric velocity in km/s  
4determined by the MOTS3 software package for computing trajectory data of double-station  
5meteor cameras (Koschny and Diaz 2002). Due to the atmospheric drag a meteoroid  
6decelerates during the atmospheric entry. We found that 40 % - 45 % of all meteors seem to  
7have an increased velocity between the first and second velocity measurement. This cannot be  
8explained by Earth's gravitational attraction. The effect is an observational bias of the camera  
9system. Both cameras are operated with a rate of 25 frames per second and a video frame  
10length of 40 ms respectively. The measurable beginning and ending time of a meteor does not  
11necessarily correspond to the video frame length of 40 ms. Consequently, it may appear in the  
12dataset that the meteor covers a smaller distance at the beginning and end of a recording. The  
13ending part of the meteor overlaps additionally with the deceleration effect. Thus, to compute  
14a proper initial geocentric velocity from a continuously operated double station meteor  
15network. The distance between the first and second video frame should not be used for the  
16velocity computation. The last velocity value should not be used for the same reason. As a  
17result, no good velocity can be determined for meteors recorded on 3 frames only. To obtain  
18two velocity measurements, the meteor has to be recorded on 5 frames.

### 194.4 Accuracy values and optical distortion

20We generated optical distortion maps to determine the astrometric deviations of the real star  
21positions relative to their expected positions according to the 3rd order polynomial plate fit  
22performed by MetRec. Figure 4 shows the computed distortion distribution for the ICC7  
23camera. The distortion is shown by plotting the deviation of the real measured star position  
24versus its expected position determined by the plate fit. It is given in arcminutes and is plotted  
25versus the radial distance from the CCD center in down-sampled pixels, The data are  
26summarized in bins of 10 pixels and visualized as a box plot<sup>1</sup>. It can be seen that the distortion

---

<sup>1</sup> A box plot is a way to visualize non-Gaussian distributions. It uses the so-called median and the inter-quartile range (IQR). The median is the point where a distribution is divided into two equal-sized sets. The 25- and 75-percentile are the lower and upper limit of the IQR; the IQR contains 50 % of the data around the median. In a box plot, the median is shown as a horizontal solid line in a box; the box itself corresponds to the IQR. The dashed line has a length of 1.5IQR. Data points outside the IQR are plotted as crosses or grey circles.

1remains approximately constant until a radius of 140 pixels. The corresponding median is at  
 2around 0.1'. With the down-sampled horizontal image size of 388 pixels this corresponds to  
 380 % of the horizontal radius; 95 % of the horizontal radius are correct to 0.2'. Due to the  
 4distortion of the optical system, the values worsen to the corners up to 0.75'. In conclusion,  
 5position measurements of meteors more than about 80 % away from the field center should be  
 6used carefully.

7Since the ICC9 distribution looks similar, only the ICC7 data are shown. We will see that  
 8other astrometric errors are larger, and conclude that at least for the inner 90 % of the field of  
 9view errors due to insufficient distortion correction can be neglected.

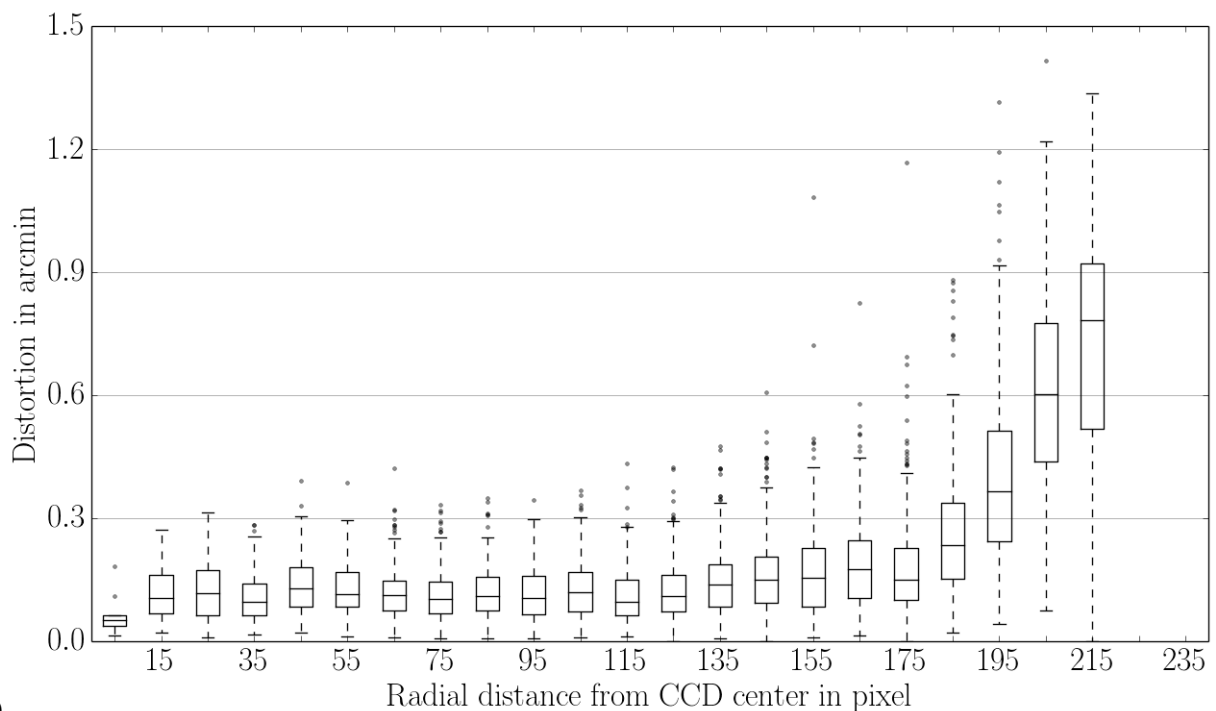

10

11 **Figure 4 – Boxplot of the ICC7 distortion. The difference between actual position and CCD position is**  
 12 **shown in arcminutes vs. the radial distance from the center of the CCD. Each box plot contains the data of**  
 13 **the a 10-pixel wide bin.**

#### 14 **4.5 Measured astrometric goodness-of-fit**

15 For each meteor, MetRec stores a value called 'accuracy' in the log file, which describes the  
 16 goodness of the fit of the individual meteor positions relative to a great circle in the sky. We  
 17 will henceforth refer to this as 'goodness-of-fit'. The value is given in arcminutes and is the  
 18 root-mean-square of the deviations of individual meteor position measurements to the

1projections on a least-square great circle line. The smaller the value, the better the fit. This  
2section analyses the recorded accuracies.

3Figure 5 shows the normalized goodness-of-fit distribution based on all meteor observations  
4for ICC7 (orange or bright bars) and ICC9 (blue or dark bars). 'Normalized' means that the  
5sum of all histogram bars is 1. The distribution plot is shown from 0.0' to 4.0' with a bin width  
6of 0.1'. This corresponds to the current accuracy resolution of MetRec. The maximum values  
7are around 10', but less than 3 % of the data are above 4' (2463 values out of 73379). We  
8therefore decided to not display them.

9It can be seen that both cameras detect a significant number of meteors with a goodness-of-fit  
10of 0.0'. Values of 0.1' and 0.2' are missing completely. The log files show that ICC7 has 3899  
11(approximately 8 %) and ICC9 has 6527 (approximately 11 %) of all measurements with  
12values of 0. For both cameras, around 55 % of all measurements correspond to meteors with a  
13length of 3 frames. Around 20 % correspond to a length of 4 frames, 10 % and 5 % to 5 and 6  
14frames, respectively. The remaining 10 % correspond to longer meteors. A fraction of these  
15can be explained with the fact that MetRec rounds the determined goodness-of-fit. However,  
16most data points in this bin seem to have been falsely generated, otherwise the gap between  
17the 0.0' bin and next bin at 0.3' cannot be explained. The following accuracy-related analysis  
18therefore neglects these data points.

19The median and interquartile range (IQR) of the ICC7 and ICC9 accuracies are  
20  $ICC7_{acc} = 1.2^{+0.9}_{-0.5}$ ' and  $ICC9_{acc} = 1.0^{+0.5}_{-0.3}$ '.

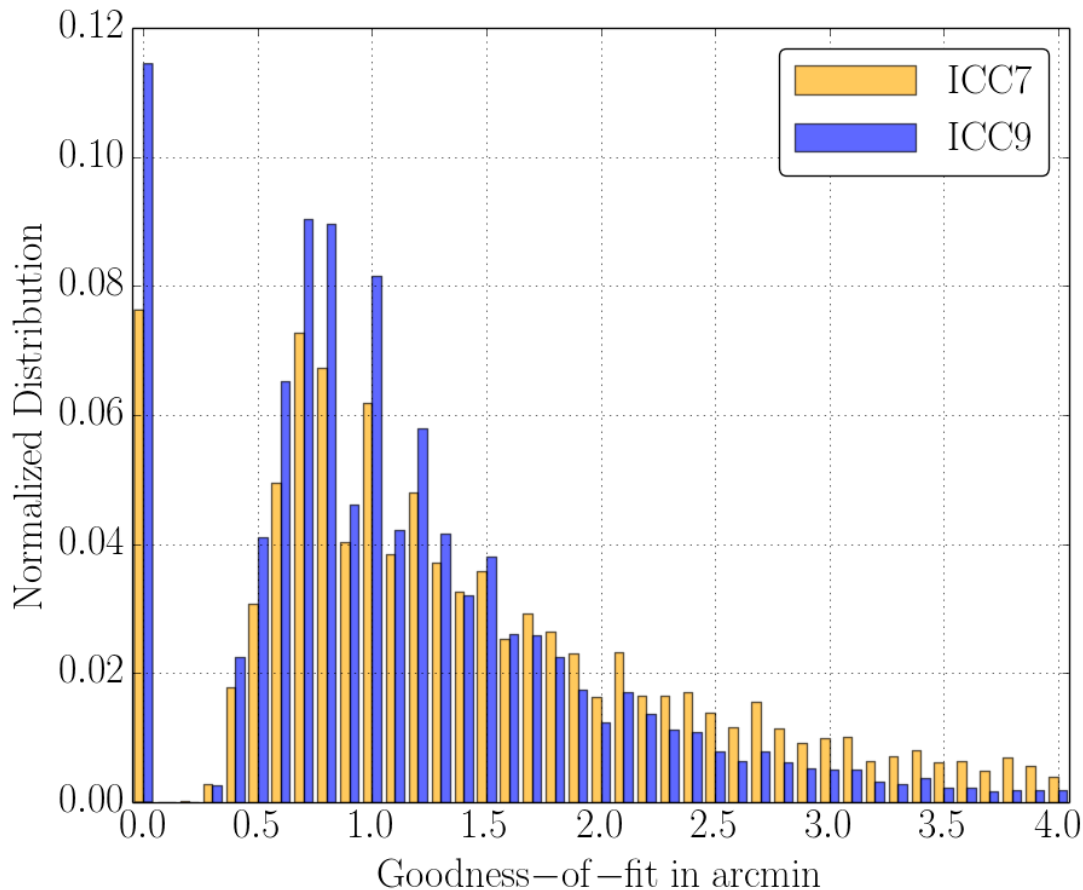

1

2**Figure 5 - Normalized distribution of determined goodness-of-fit in arcminutes. The orange and blue bars**  
 3**show the distribution for ICC7 and ICC9, respectively. The bars are slightly off-centered and have an**  
 4**actual width of 0.1', e.g.: the first two bins show the contribution of [0.0', 0.1') for ICC7 and ICC9.**

5MetRec uses half resolution images for the detection, *i.e.* 384 pixel x 288 pixel. The obtained  
 6average goodness-of-fit is thus about 1/4 pixel. Taking into account that the used sensor is an  
 7interline transfer video chip and the field of view is rather large, this result is acceptable.

8When using these data to compute orbits, one can use the goodness-of-fit values to estimate,  
 9via Monte-Carlo runs, the errors of the orbital elements. A Monte-Carlo based method to  
 10compute the astro-dynamic properties of the detected meteors is described in detail in Albin *et*  
 11*al.* (2016). To simplify this procedure, it is proposed to use an average error value as derived  
 12in the following.

13Figure 6 shows a box plot of the complete accuracy data of ICC7 and ICC9 in arcminutes  
 14versus the length of a meteor measured in number of frames. All goodness-of-fit values from  
 15the log files have been used with the exception of the 0.0' data. The Figure shows the

1 distribution of meteor lengths between 3 and 40 frames and the number above each box gives  
 2 the number of data points in the corresponding bin. The longest meteor recorded with CILBO  
 3 is about 80 frames. For a better visualization and readability, we show only data until 40  
 4 frames. For higher values, the total number of measurements drops further and does not allow  
 5 any statistical conclusions. It can be seen that the median, the IQR, and 1.5 IQR range  
 6 increase for meteor lengths of 3 to 7 frames. The median increases from 1.1' to around 1.5'.  
 7 From 7 to 8 frames, the accuracy jumps to better values: The median drops to 1.0'. This is due  
 8 to a setting in the MetRec fitting algorithm. Up to 7 frames, the program uses a constant  
 9 velocity value. A meteor which is recorded on 8 or more frames is fitted with a linear velocity  
 10 fit which leads to a better goodness-of-fit, as can be seen in the changing box size between  
 11 frame 7 and 8. For meteors of length 8 to 40 frames, the accuracy worsens again slightly. The  
 12 number of data points which lie outside the box plots decreases for higher frame numbers.  
 13 The largest data scatter can be seen for meteor recorded on 3 frames. In some cases, the  
 14 goodness-of-fit becomes as bad as 10', because either the linear velocity fit was insufficient  
 15 for very long meteors or outlier frames caused by noise or nearby stars were not properly  
 16 detected and removed.

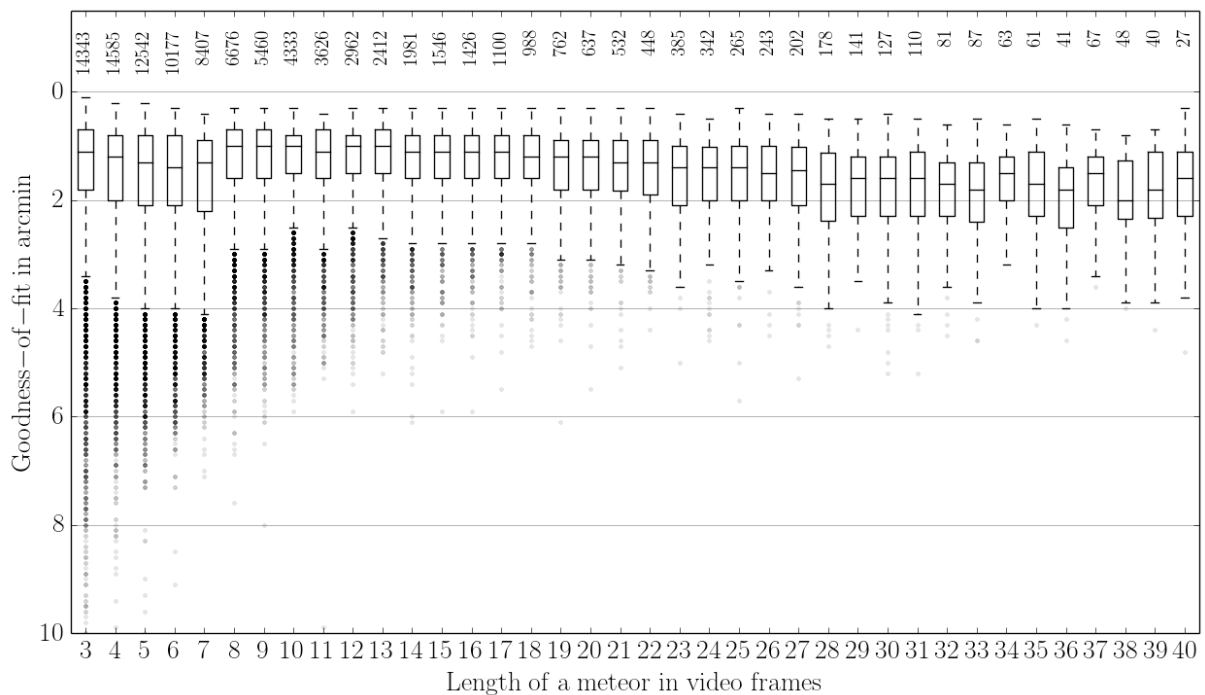

17

18 **Figure 6 – Goodness-of-fit vs. frame length.** The box plots show the median, Inter-Quartile Range (IQR)  
 19 and 1.5 IQR. The numbers on the top show the number of data points for each bin.



In conclusion, we suggest to assume a typical deviation of about 1.0'-1.2' to cover all uncertainties in the astrometry. This corresponds to about 1 pixel.

### 34.6 Magnitude Distribution

ICC7 and ICC9 have the same technical setup and are operated in a similar way. Items like the detection threshold and the minimum number of frames per meteor are identical. Here, we compare the measured brightness distribution of both CILBO cameras, to check whether deviations in the data can be identified. For our analysis we assume that meteors appear randomly on the sky. Since some meteors either begin or end outside CILBO's field-of-view (FOV) or both, we consider only meteors which were completely within the FOV. Otherwise a bias or offset in the meteors' brightness profile would affect the statistics. For the analysis we take only meteors into account that are not closer to the CCD edges than 5 % of the length and width of the CCD, respectively. Thus, the data set reduces to 49494 meteors for ICC7 and 1354402 meteors for ICC9 which corresponds to 97 % and 96 % of each individual data set, respectively.

Figure 7 shows the normalized distribution of the ICC7 and ICC9 brightness data vs. the peak brightness values in magnitudes. The orange (brighter) curve corresponds to the ICC7 data and the blue (darker) curve corresponds to the ICC9 data. The median and corresponding IQR for both cameras are  $ICC7_{mag,peak} = 2.92^{+0.76}_{-0.97}$  mag and  $ICC9_{mag,peak} = 3.32^{+0.70}_{-0.88}$  mag, respectively. This shows that ICC9 detects fainter meteors than ICC7. The brightness median difference between both cameras is 0.40 mag. We will show later that this is due to the different pointing directions of the cameras. Thus, the pointing affects the detected number of meteors for a given magnitude.

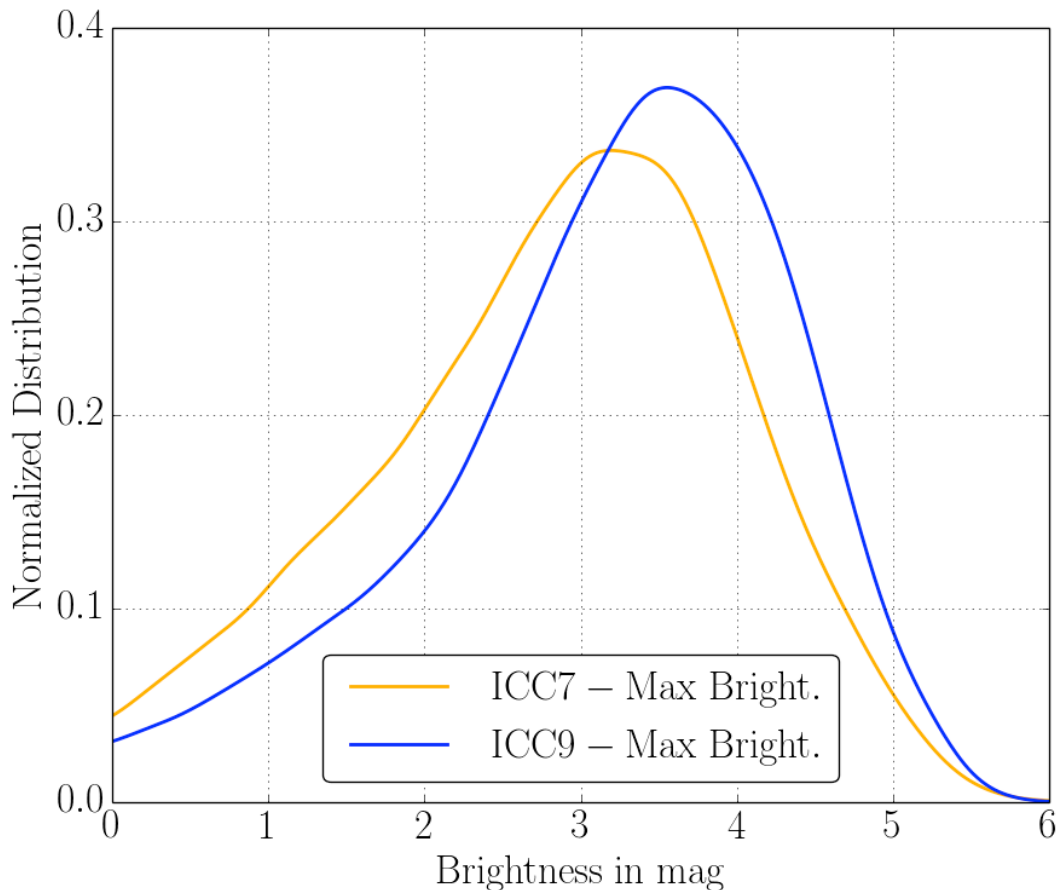

1

2 **Figure 7: Normalized distribution of the peak brightness in magnitudes. The orange and blue curve**  
3 **correspond to the ICC7 and ICC9 camera, respectively.**

#### 44.7 Distribution of the length of a meteor in frames

5 MetRec’s detection threshold is currently set to 3 frames. With 25 frames per second this  
6 corresponds to a meteor duration of larger than 40 ms (starting at the very end of the exposure  
7 of the first frame, ending at the very beginning of the last one) to 120 ms. In some rare cases a  
8 meteor with 3 frames can also have an appearance time of e.g. 160 ms, due to frame drops in  
9 the detection pipeline.

10 Figure 8 shows the normalized distribution of the length of the meteors in number of frames.  
11 The solid histogram represents the ICC7 data and the dashed histogram shows the ICC9 data.  
12 CILBO detects meteors with a length of up to 70 – 80 frames. For a better data readability, we  
13 show here the distributions up to a length of 15 frames, corresponding to a meteor appearance  
14 time of 0.6 seconds. It can be seen that the number of meteor recordings decreases for longer  
15 events. Both distributions peak at meteors with a length of 3 frames. For increasing lengths,

1the number of meteors decreases faster for ICC9 than for ICC7. ICC7 detects more meteors  
 2on 3 to 7 frames than ICC9. Afterwards, the ICC7 distribution is slightly above the one of  
 3ICC9.

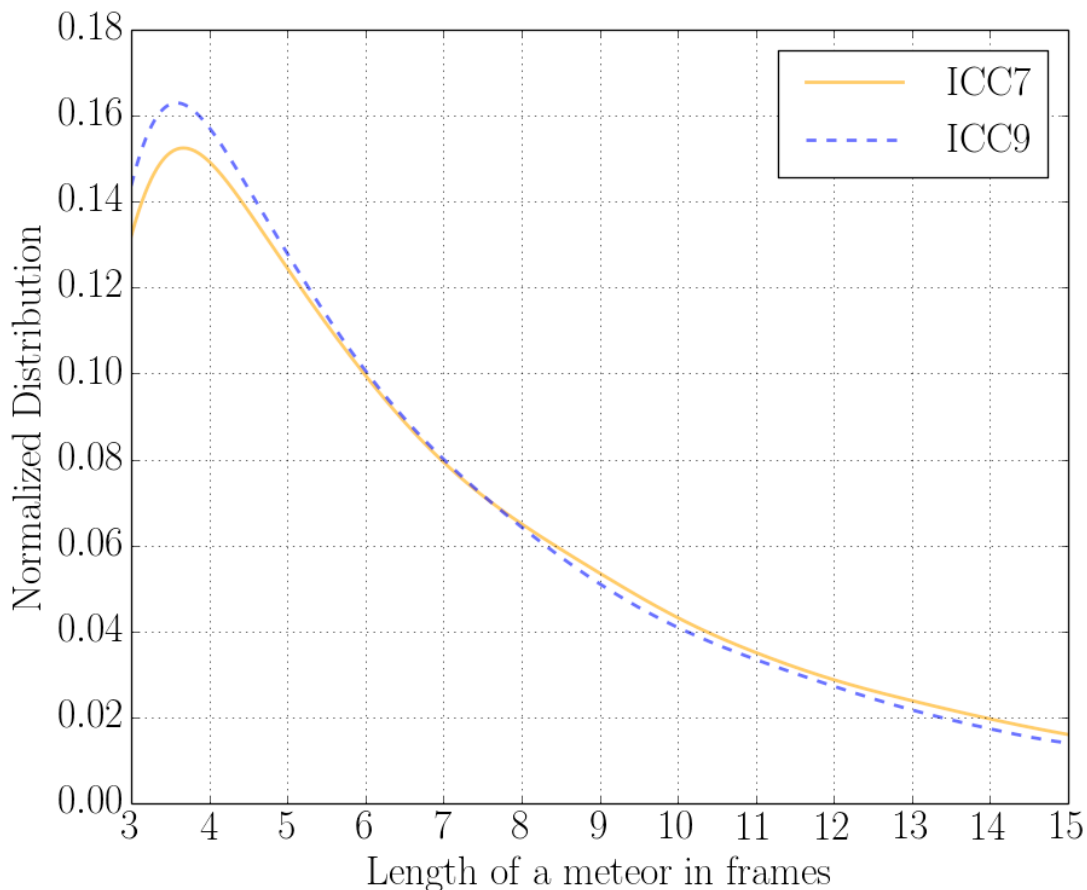

4

5**Figure 8: Normalized distribution of the recorded frames for ICC7 (solid curve) and ICC9 (dashed curve).**  
 6**Since MetRec’s detection threshold is set to 3 frames, no meteors are recorded on fewer frames.**

### 7**4.8 Velocity distribution**

8The apparent velocity of a meteor is computed from its position in each frame and assuming  
 9that the frame rate is 40 ms. The position of a meteor is available in two coordinate systems:  
 10Firstly, in a CCD-fixed system given as x/y value pairs, corresponding to the horizontal and  
 11vertical position on the sensor, counted from the lower-left corner. x and y are normalized and  
 12range from 0 to 1. To convert the positions in pixels, x and y need to be multiplied by a factor  
 13of 768 and 576, respectively, which corresponds to the PAL resolution. Since MetRec  
 14downsamples both axes by a factor of two we use values of 384 pixel x 288 pixel for all  
 15detection-related aspects in this paper.

1The second coordinate system which MetRec provides the astrometry in is the equatorial  
2coordinate system, where the meteor position is given in Right Ascension and Declination.  
3Due to optical distortions, the angular velocity distribution in degrees differs from the  
4distribution given in CCD coordinates depending on the position in the field of view. Since  
5this paper focuses on the technical aspects of the CILBO cameras, we consider in the  
6following only the apparent velocity in the CCD-fixed coordinate system. For those who  
7prefer to think in degrees per second, note that 100 px/s will be roughly 7 deg/s with the field  
8size of our cameras.

9Figure 9 shows the density distribution of ICC7 and ICC9 versus the velocity in pixels per  
10second. The solid curves are the distributions of all mean meteor velocities, where the orange  
11(lighter) curve corresponds to ICC7 and the blue (darker) curve corresponds to ICC9 data.  
12The velocity axis ranges from 0 to 300 px/s (about 21 deg/s). It can be seen that both  
13distributions have a similar shape, however ICC9 converges faster to 0 than the ICC7  
14distribution. This means that ICC7 records more fast meteors than ICC9. The curve for ICC7  
15is flatter and crosses that for ICC9 at 195 px/s. The median and IQR (given as the error  
16values) for ICC7 and ICC9 are  $ICC7_{vel} = 158^{+151}_{-77}$  px/s and  $ICC9_{vel} = 146^{+93}_{-66}$  px/s,  
17respectively. This shows quantitatively that the ICC7 distribution is wider spread.

18Meteors appear and disappear at some arbitrary time during the exposure time of the first and  
19last frame of a detection (see Section 4.4). Thus, normally the determined photometric centers  
20of the first and last frame are shifted towards the photometric centers determined from the  
21second and second-to-last video frame, respectively. To compute the velocity, the time  
22interval between two frames is used, namely 40 ms. This means that the first and last velocity  
23determination typically are under-estimated. We leave away those values and call this the  
24filtered velocity data. The dashed curves in Figure 9 show the filtered mean velocity data sets  
25of ICC7 and ICC9. Both dashed curves appear similar to the solid ones. The median and IQR  
26values for both filtered datasets are  $ICC7_{vel,unbiased} = 157^{+149}_{-76}$  px/s and  
27  $ICC9_{vel,unbiased} = 150^{+95}_{-67}$  px/s, corresponding to roughly 10 deg/s.

28In the following sections, we only use the filtered velocity data set if not otherwise  
29mentioned. We suggest velocities computed from the first and last recorded frame should not  
30be used.

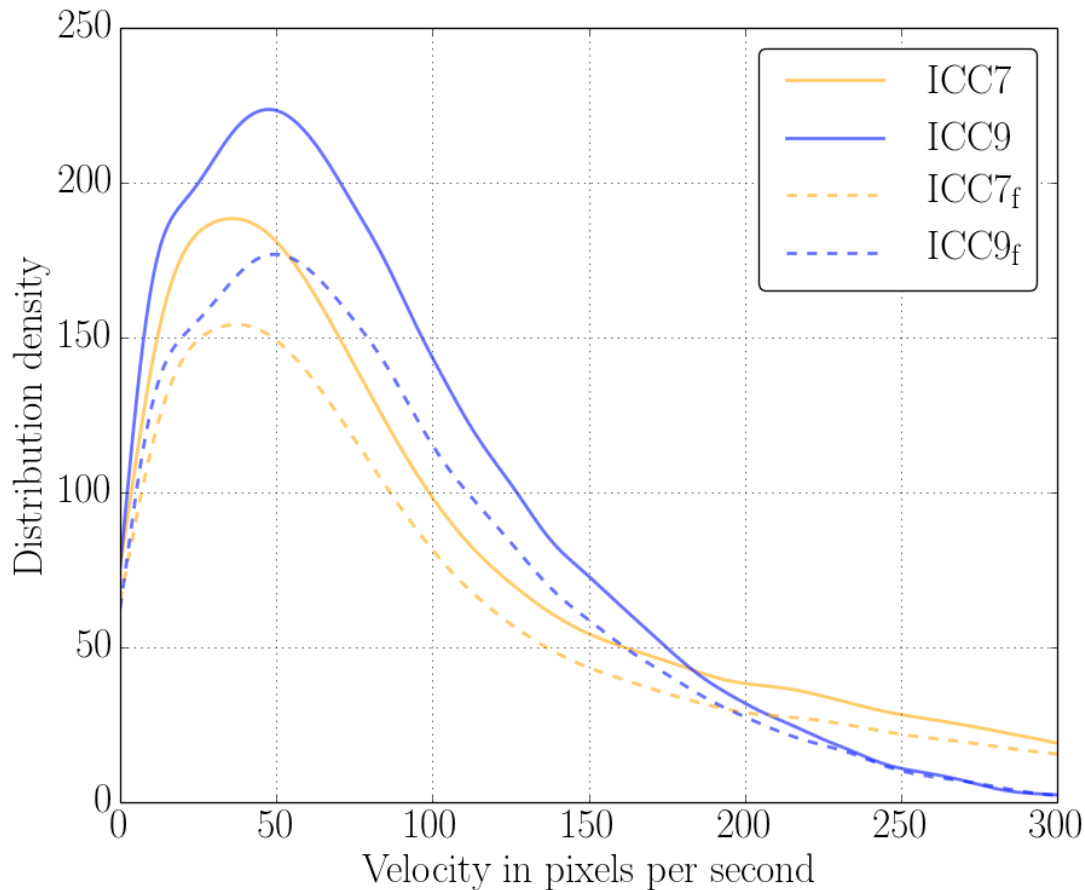

1

2 **Figure 9 - Distribution of the meteor velocities in pixel per second. The orange (bright) curves correspond**  
3 **to ICC7 and the blue (dark) curves show the ICC9 data. The solid distributions show the complete data**  
4 **set, containing all determined velocities. The dashed curves show the filtered velocity data set as explained**  
5 **in the text.**

## 64.9 Correlation between different measurements

### 74.9.1 Overview

8 In Sections 4.2 to 4.8 we showed distributions of different measured values like the accuracy  
9 or brightness of a meteor as determined by MetRec. Both ICC cameras are identical, but show  
10 deviations in the measured parameters. This section investigates possible correlations between  
11 certain measurements and parameters.

12 First, we describe the dependencies between the measurements and the recorded frame length.  
13 Afterwards we investigate possible detection time correlations. The last two sub-sections  
14 show some correlations with the measured brightness and determined velocities.

## 14.9.2 Peak magnitude as function of meteor length and velocity

2Figure 10 to Figure 13 show box plots of the maximum brightness of a meteor in magnitudes  
3and filtered mean apparent velocity in pixels per second for ICC7 and ICC9, respectively. The  
4data are plotted vs. the length of a meteor in frames. Only meteors which were detected  
5completely within the FOV of the cameras are considered.

6The median and corresponding IQR of the brightness data for ICC7 and ICC9 show that the  
7maximum brightness increases for longer meteors. Meteors with a length of 3 frames have a  
8median and IQR of  $3.4_{-0.6}^{+0.6}$  mag for ICC7 and  $3.8_{-0.5}^{+0.6}$  mag for ICC9. It can also be seen  
9that the medians and IQRs of ICC9 are shifted towards fainter meteors by a factor of around  
100.2 - 0.4 mag, consistent with Figure 7.

11The box plots of the velocity distributions for ICC7 and ICC9 (Figure 12, Figure 13) show a  
12slight difference. Median and IQR for ICC9 are basically constant for all shown meteor  
13lengths. The IQR ranges between 50 and 150 px/s. ICC7, however, shows a decrease in the  
14velocity for an increasing number of video frames. The maximum is at the beginning where  
15the median is at around 75 px/s and the IQR boundaries are at 40 px/s and 140 px/s. The  
16decreasing median and IQRs converge with the ICC9 data at around frame 11.

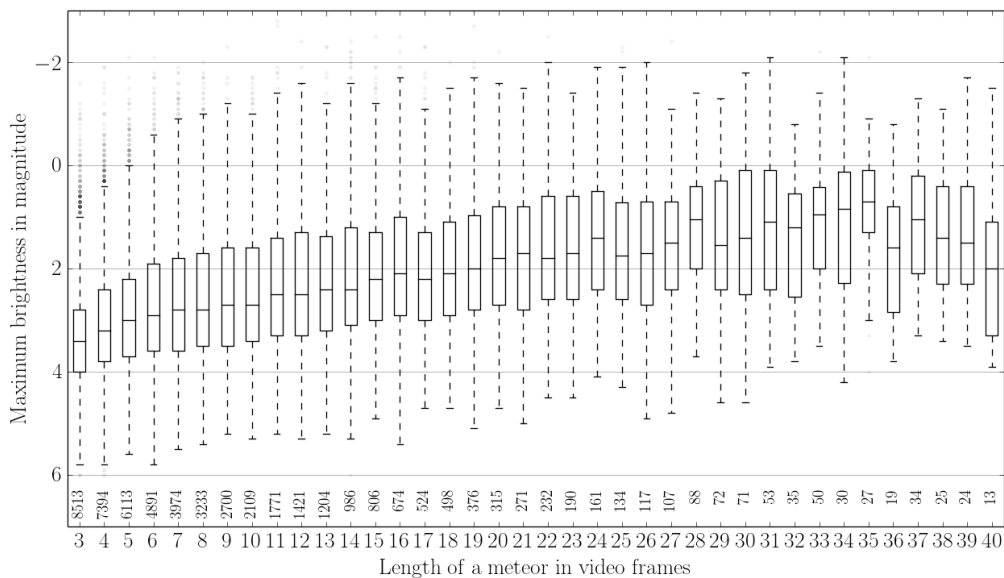

17

18Figure 10 - Maximum brightness in magnitude vs the length of the meteor in frame numbers for ICC7.  
19The box plot shows the median, IQR and 1.5IQR. The number shown on the bottom indicates the number  
20of used data points per frame bin.

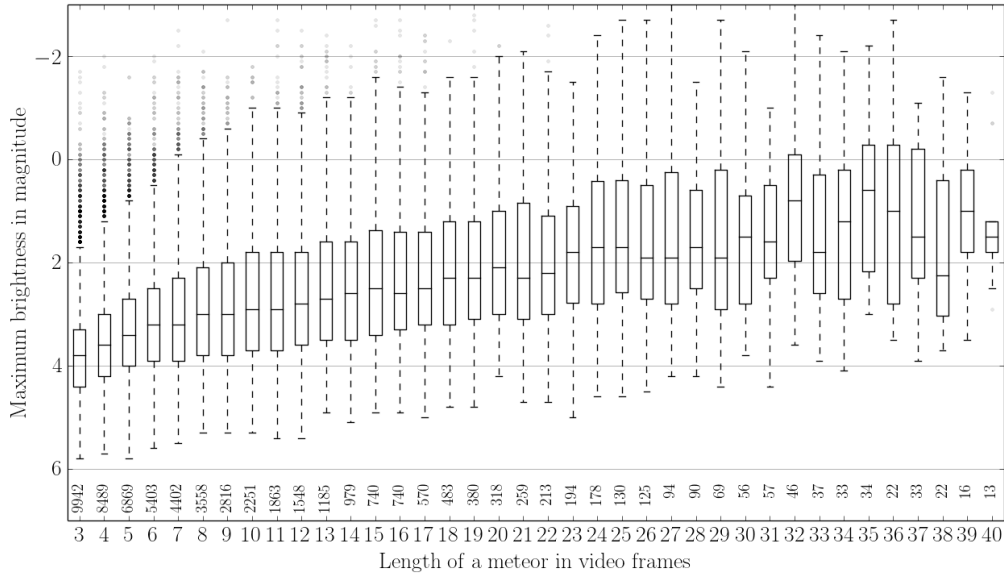

1

2Figure 11 - Maximum brightness in magnitude vs length of the meteor in frame numbers for ICC9. The  
 3box plot shows the median, IQR and 1.5IQR. The number shown on the bottom indicates the number of  
 4used data points per frame bin

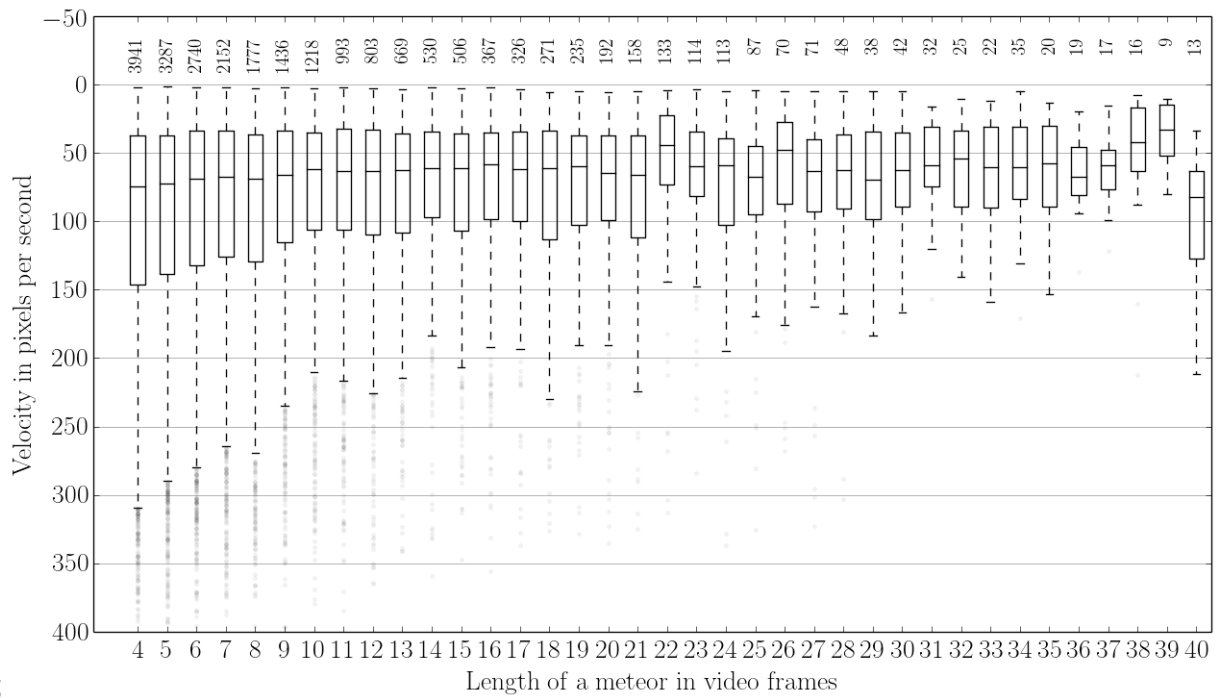

5

6Figure 12 - Apparent meteor velocity in pixels per second versus the video frame length for ICC7. The box  
 7plot shows the median, IQR and 1.5IQR. The number shown on the top indicates the number of used data  
 8points per bin.

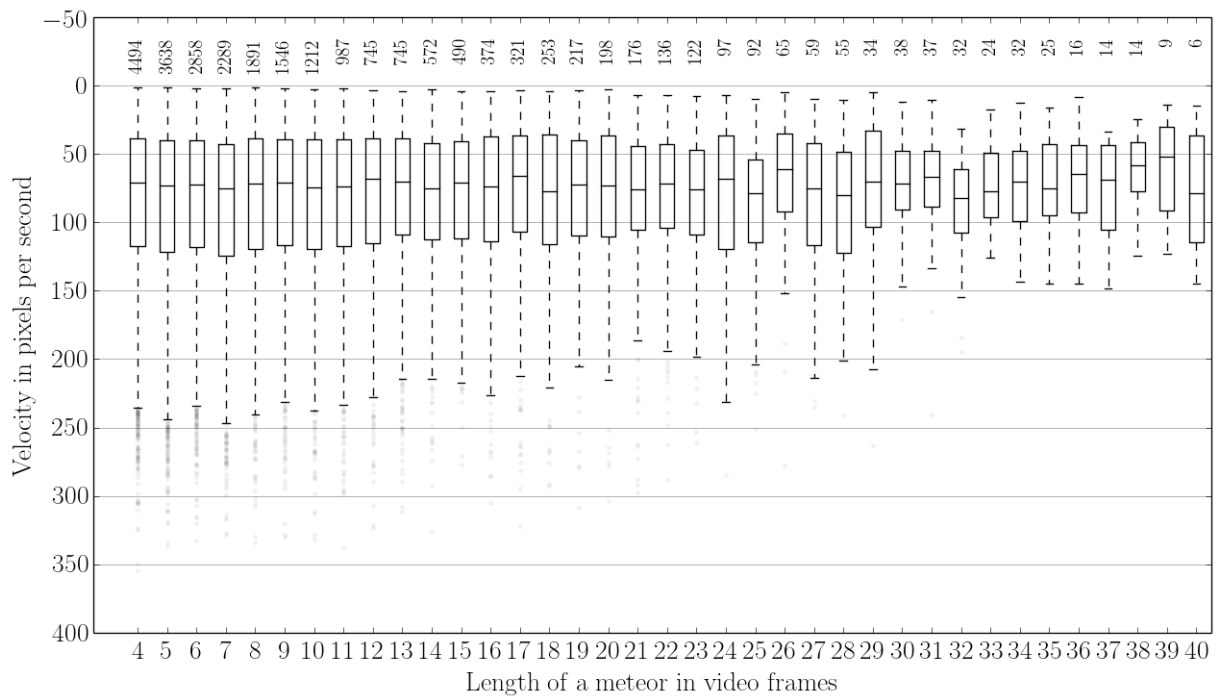

1

2**Figure 13 - Apparent meteor velocity in pixels per second vs the video frame length for ICC9. The box**  
 3**plot shows the median, IQR and 1.5\*IQR. The number shown on the top indicates the number of used**  
 4**data points per bin.**

5

### 64.9.3 Goodness-of-fit versus peak magnitude

7Figure 14 and Figure 15 show the measured goodness-of-fit versus the average peak brightness  
 8in mag for ICC7 and ICC9, respectively. We use all goodness-of-fit values larger than 0.0'.

9The shown figures show the data up to 6.0' in a magnitude range from -2.0 mag to 6.0 mag.  
 10The solid line, box and the dashed lines are the median, IQR and corresponding 1.5 IQR  
 11limits. The goodness-of-fit gets smaller (i.e. better) for fainter meteors. For ICC7, the median  
 12of the goodness-of-fit at -2.0 mag is 3.0' with an IQR of around +/-1.0'. The median decreases  
 13to 1.0' at 6.0 mag. Also, the IQR range narrows towards fainter meteors. For bright meteors,  
 14the median and IQR of ICC9 is better by around 1.0'. Median and IQR converge with the  
 15ICC7 values for fainter meteors but the IQR is slightly broader.

16As mentioned in Section 3.3.3.(b), bright meteors overexpose the CCD pixels. This leads to  
 17blooming which results in an additional broadening of the meteor on a single video frame.  
 18Another effect may be that bright meteors are more likely to display a wake (Section  
 193.3.3.(a)). Due to these effects the photometric center cannot be determined correctly, which  
 20leads to a larger position determination error for brighter meteors.



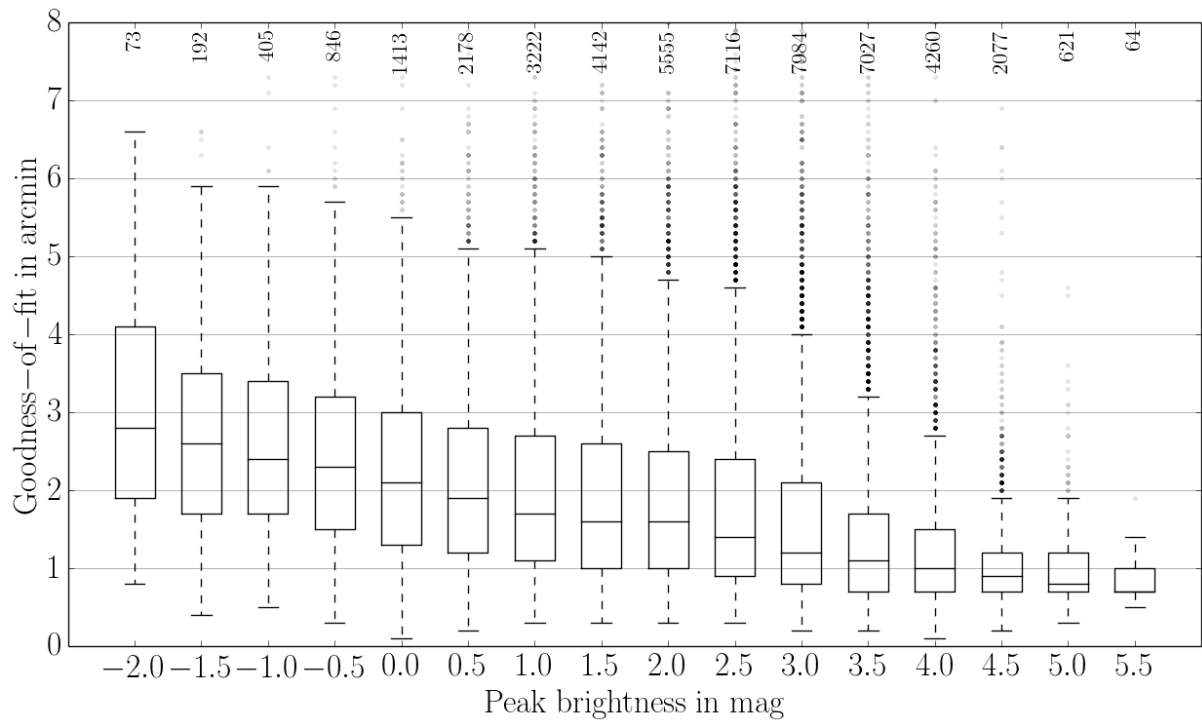

1

2Figure 14 - Goodness-of-fit versus peak brightness in magnitude for ICC7. The box plot shows the 3median, IQR and 1.5IQR. The number shown on the top indicates the number of used data points per 4peak brightness bin.

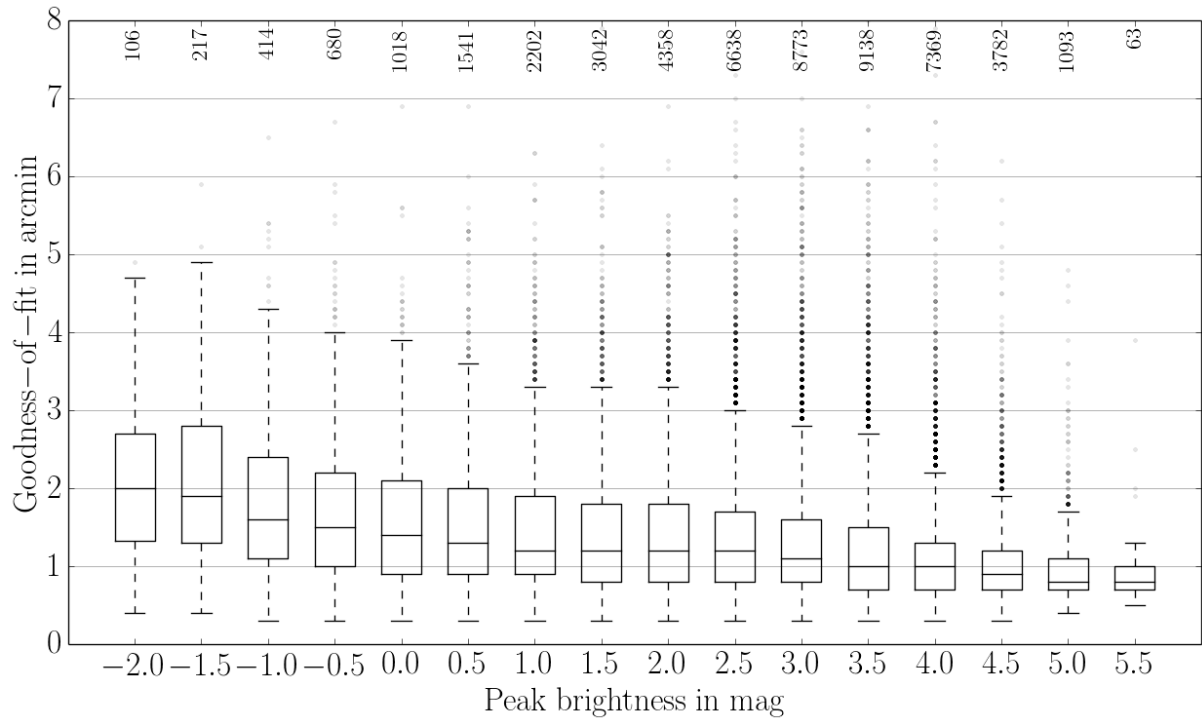

5

6Figure 15 - Goodness-of-fit vs. peak brightness in magnitude for ICC9. The box plot shows the median, 7IQR and 1.5IQR. The number shown on the top indicates the number of used data points per peak 8brightness bin.

## 15 Discussion

2 Even though both cameras are identical from a technical point of view, ICC9 detects fainter  
3 meteors. We argue in the following that this is a geometrical effect and can be explained by  
4 the camera pointing direction.

5 Both camera boresights intersect between Tenerife (ICC7) and La Palma (ICC9) at an altitude  
6 of 100 km. Thus, ICC7 is pointing roughly to the West and ICC9 to the East. The elevations  
7 of the boresights with respect to the horizon are approximately 53 degrees.

8 In Figure 16 and Figure 17 we plot the angular distance between the camera boresights and  
9 the Apex and Antihelion (AH) directions for the time frame 18 UTC to 6 UTC. The red  
10 dashed line is the angular distance to the Apex, the blue dashed line to the Antihelion  
11 direction. The shaded areas around the lines indicate the annual variation. The black vertical  
12 lines indicate the rise times of Antihelion (blue, left line) and Apex (red, right line). Again,  
13 the shaded area indicates the annual variation. The thick black line is the normalized  
14 distribution of the observed meteors as a function of time during the night.

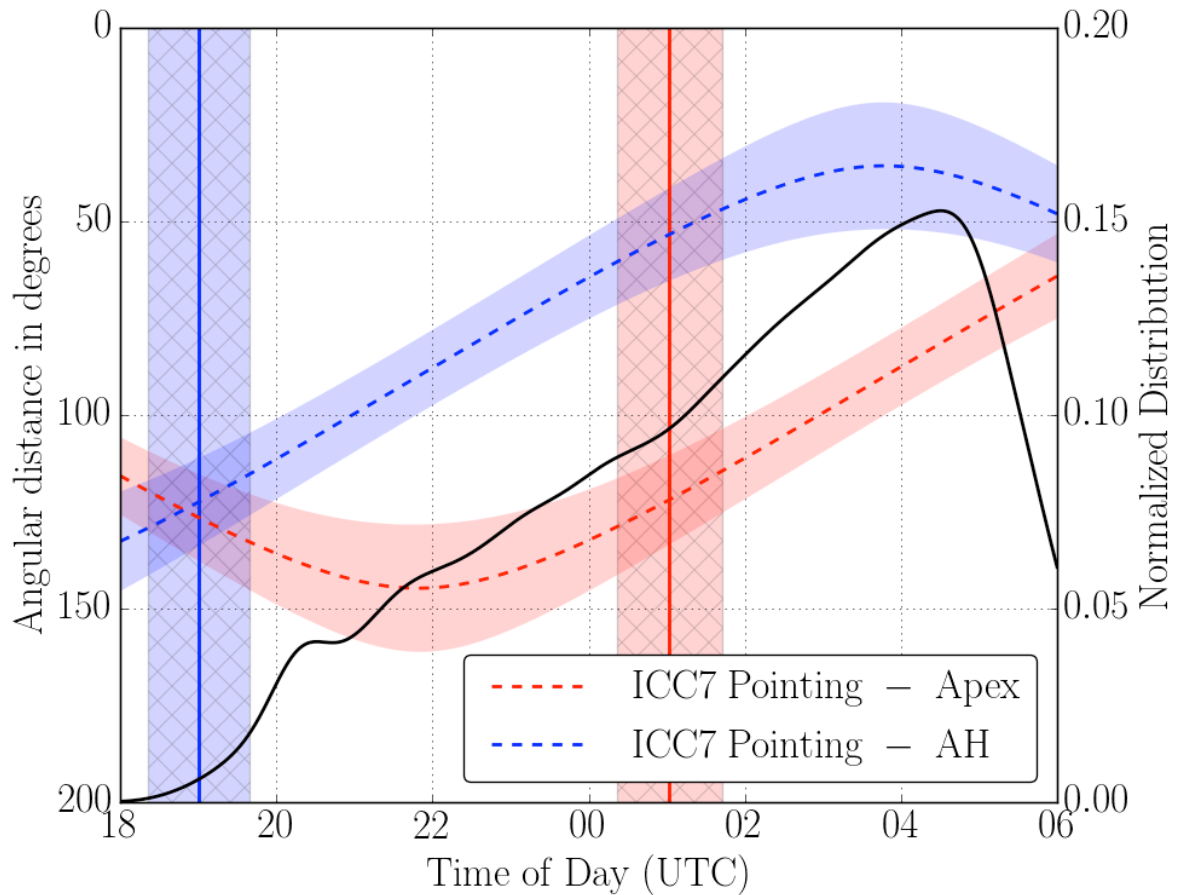

1

2Figure 16 – Angular distance and normalized distribution of detected meteors vs. the time of the day in  
3UTC (ICC7). The red (upper) and blue (lower) dashed curves show the angular distance between the  
4ICC7 boresight and the Apex and Antihelion direction, respectively. The colored areas around the dashed  
5lines show the yearly variations. The solid vertical lines indicate the rising time of the Apex (blue, left) and  
6the Antihelion (red, right) radiants. The hatched area shows the yearly variations. The black curve  
7corresponds to the right axis and gives the normalized number of all detected meteors.

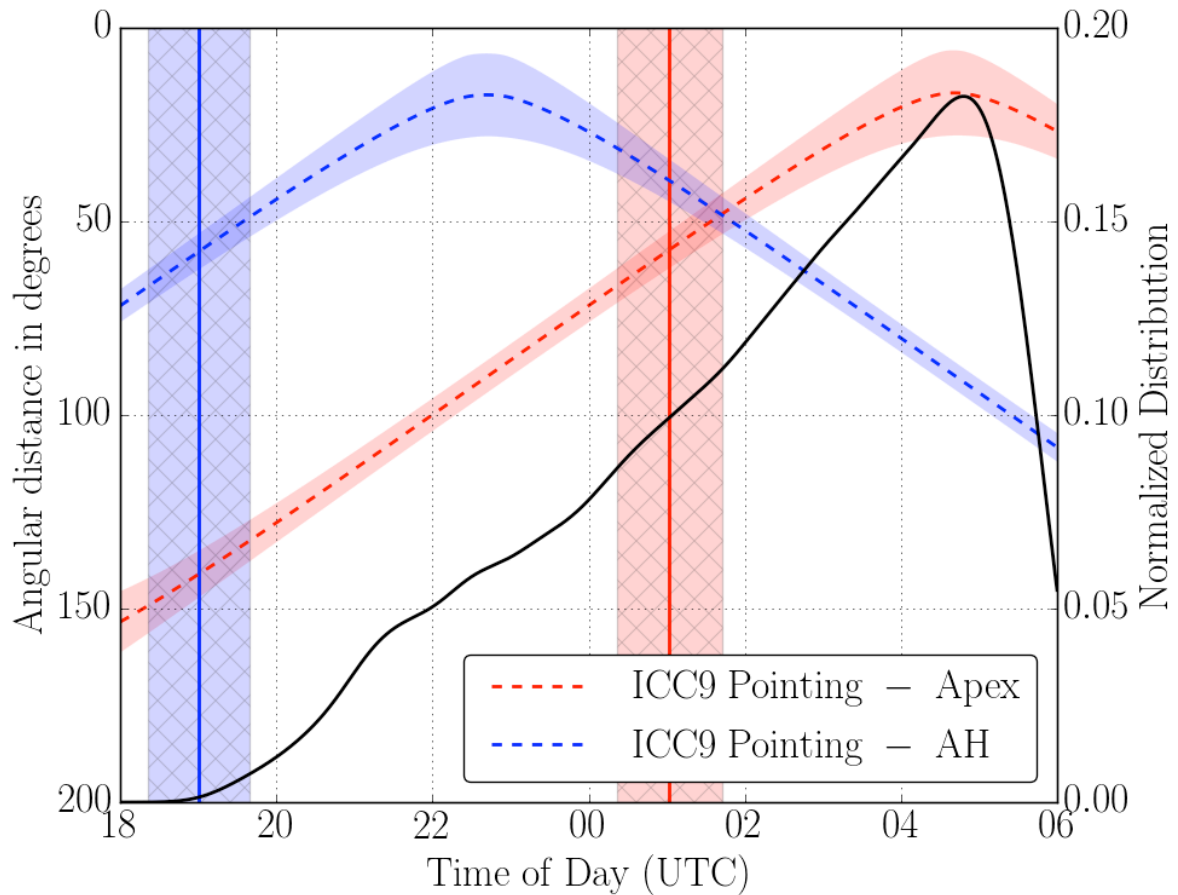

1

2**Figure 17 – Angular distance and normalized distribution of detected meteors vs. the time of the day in**  
3**UTC (ICC9). The red (upper) and blue (lower) dashed curves show the angular distance between the**  
4**ICC9 boresight and the Apex and Antihelion direction, respectively. The colored area around the dashed**  
5**lines show the yearly variations. The solid vertical lines indicate the rising time of the Apex (blue, left) and**  
6**the Antihelion (red, right) radiants. The hatched area shows the yearly variations. The black curve**  
7**corresponds to the right axis and gives the normalized number of all detected meteors.**

8The Antihelion point rises shortly after sunset, the Apex direction after midnight. Since ICC7  
9is pointing towards the West, its angular distance to the Apex point is always much larger  
10than for ICC9.

11Figure 18 shows the ratio between the number of meteors for a given apparent velocity of  
12ICC9 to ICC7, using a kernel density estimator (Pedregosa *et al.* 2011). This plot shows an  
13interesting behavior. Starting after midnight, ICC9 sees more meteors than ICC7 in the  
14velocity range of 50 to 200 pxel/s. The peak moves to higher speeds during the night. After  
15about 04 UTC, ICC9 detects more meteors also for low velocities. We explain this by the  
16distance of the camera boresights to Apex and Antihelion sources. The Apex is very close to

1the boresight of ICC9 in the morning hours, thus the apparent velocity of these meteors is  
 2low. Since the relative speed to the Earth is high, more meteoroids of a given mass will  
 3become visible as they generate brighter meteors.

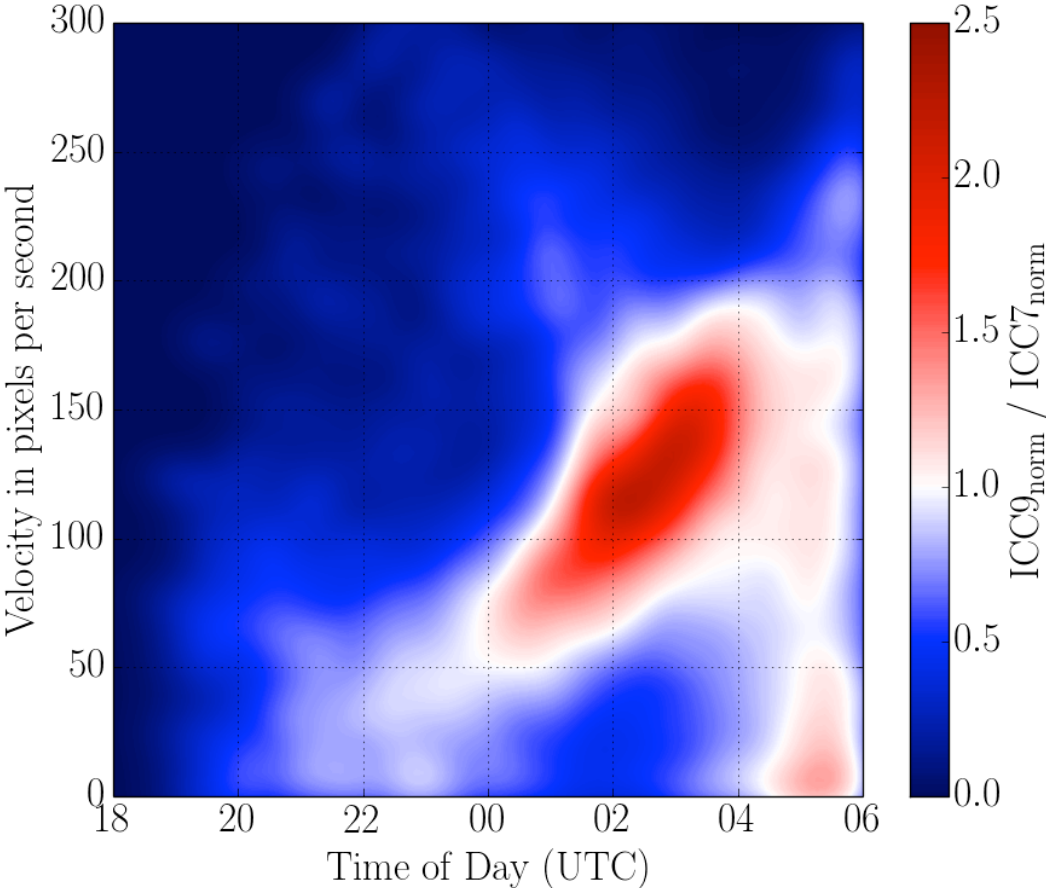

4

5**Figure 18 - Ratio plot of the velocity in pixels per second of ICC9 divided by ICC7 vs. the detection time.**  
 6**The ratio is color coded and given in the right color bar.**

7The larger number of slow meteors in ICC9 also explains Figure 19. Since the meteors are  
 8slower, they spend more time on a pixel and fainter meteors can be detected. This is an  
 9important finding to derive scientific conclusions like e.g. determining flux densities. The  
 10limiting magnitude determined for stars will be identical for identical systems, no matter  
 11where the camera is pointing. However, the detection threshold for meteors will be different.

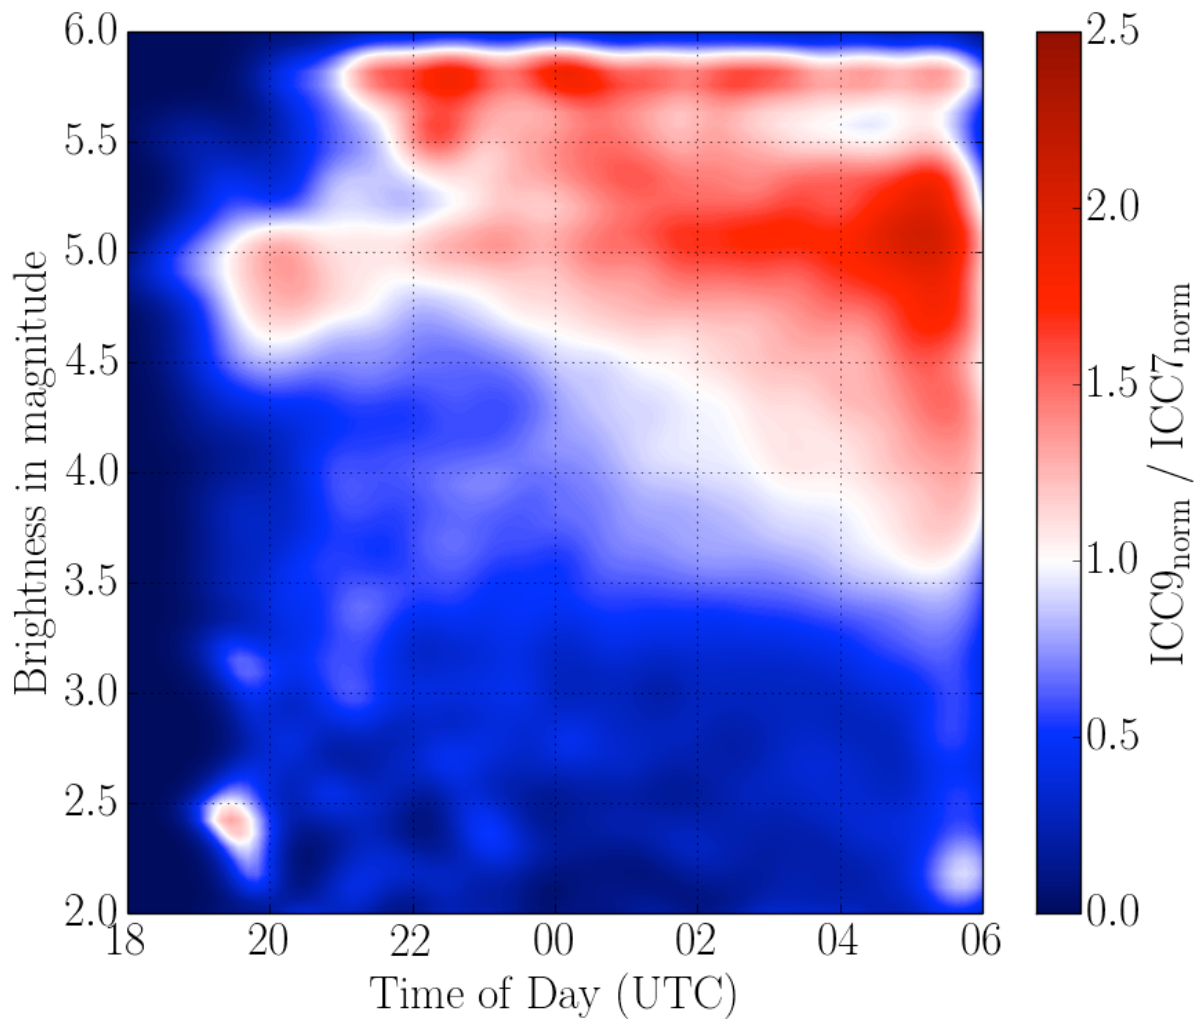

1

2**Figure 19 - Ratio plot of the faintest brightness measurements of ICC9 divided by ICC7 vs. the detection**  
 3**time. The ratio is color coded and given in the right color bar.**

4In Figure 14 and Figure 15 we showed that the goodness-of-fit is a function of the magnitude.  
 5Since the magnitude distribution changes over the night, also the goodness-of-fit will change  
 6over night. This is illustrated in Figure 20 and Figure 21. The goodness-of-fit is best during  
 7the evening hours, and gets worse towards the morning. The solid line indicates the median  
 8value, the dashed lines the IQRs. The values start at around 0.7' (ICC7) and 1.0' (ICC9) and  
 9decrease over the night. We claim that this is a result of the variable radiant distance and the  
 10changing magnitude distribution over the night.

11

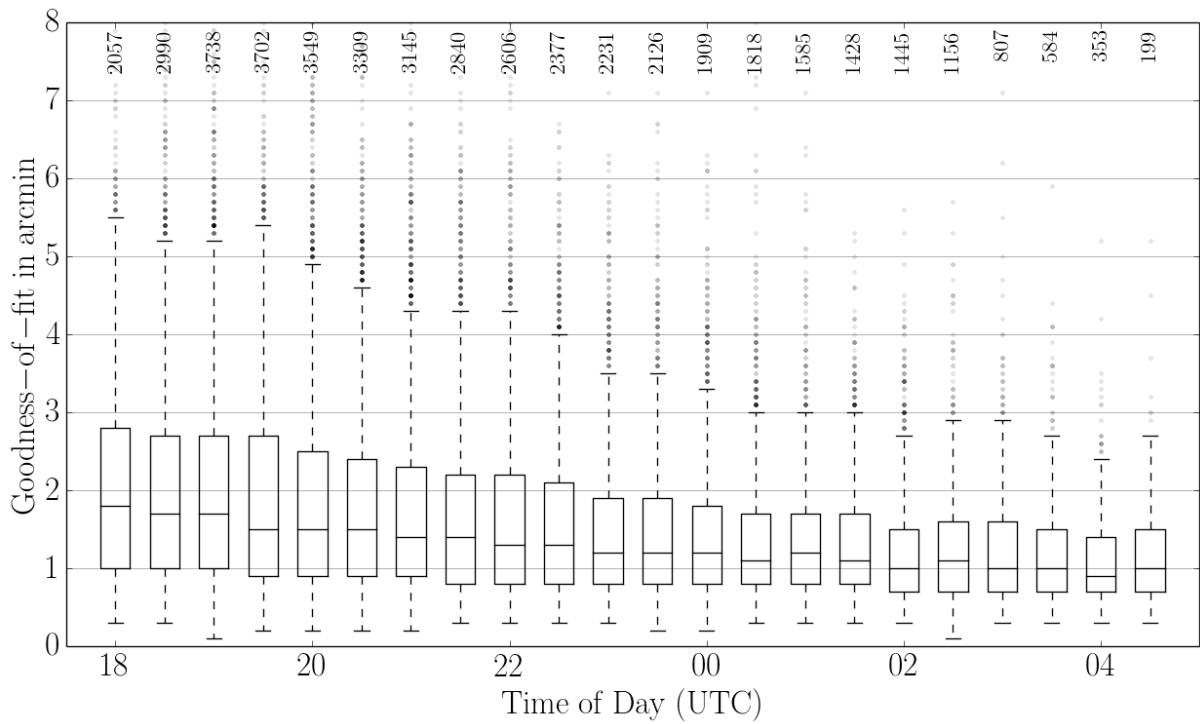

1

2Figure 20 – Goodness-of-fit vs. detection time for ICC7. The box plot shows the median, IQR and 1.5IQR.

3The number shown on the top indicates the number of used data points per peak brightness bin.

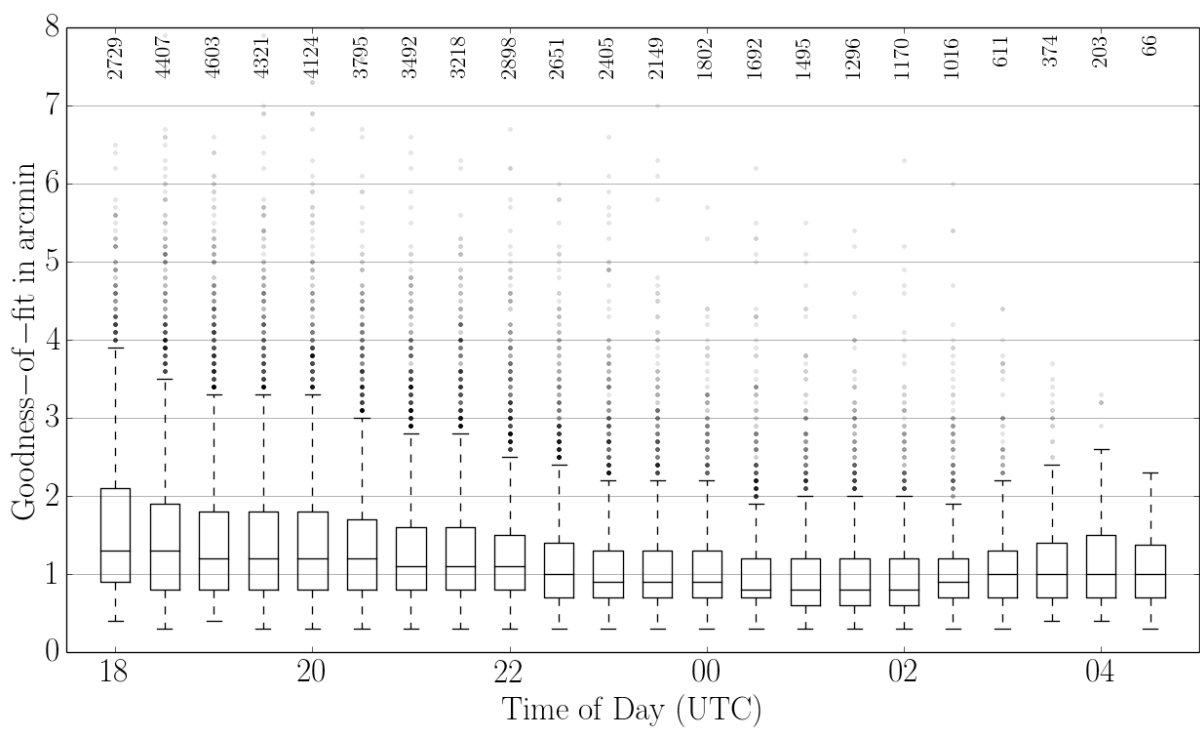

4

5Figure 21 - Goodness-of-fit vs. detection time for ICC9. The box plot shows the median, IQR and 1.5IQR.

6The number shown on the top indicates the number of used data points per peak brightness bin.

1Figure 22 shows three plots of the normalized length of a meteor in frames versus time for  
2both ICC7 and ICC9, plus the ratio between two distributions. For each frame length bin, the  
3integral of the distribution is 1. The color map limits are the same for both cameras to  
4visualize the differences between both camera systems. It can be seen that both distributions  
5show a similar evolution over time. Longer meteors are dominantly present during the  
6evening and midnight hours and short meteors appear mostly during the morning hours.  
7However, the distributions of ICC7 are wider spread than the distributions of ICC9. The ratio  
8indicates a higher contribution of short meteors for ICC9, by a factor of up to 2. We explain  
9this again by the Apex meteors. ICC9 points closer to the Apex than ICC7, in particular  
10during the morning hours. Thus Apex meteors appear shorter in ICC9.



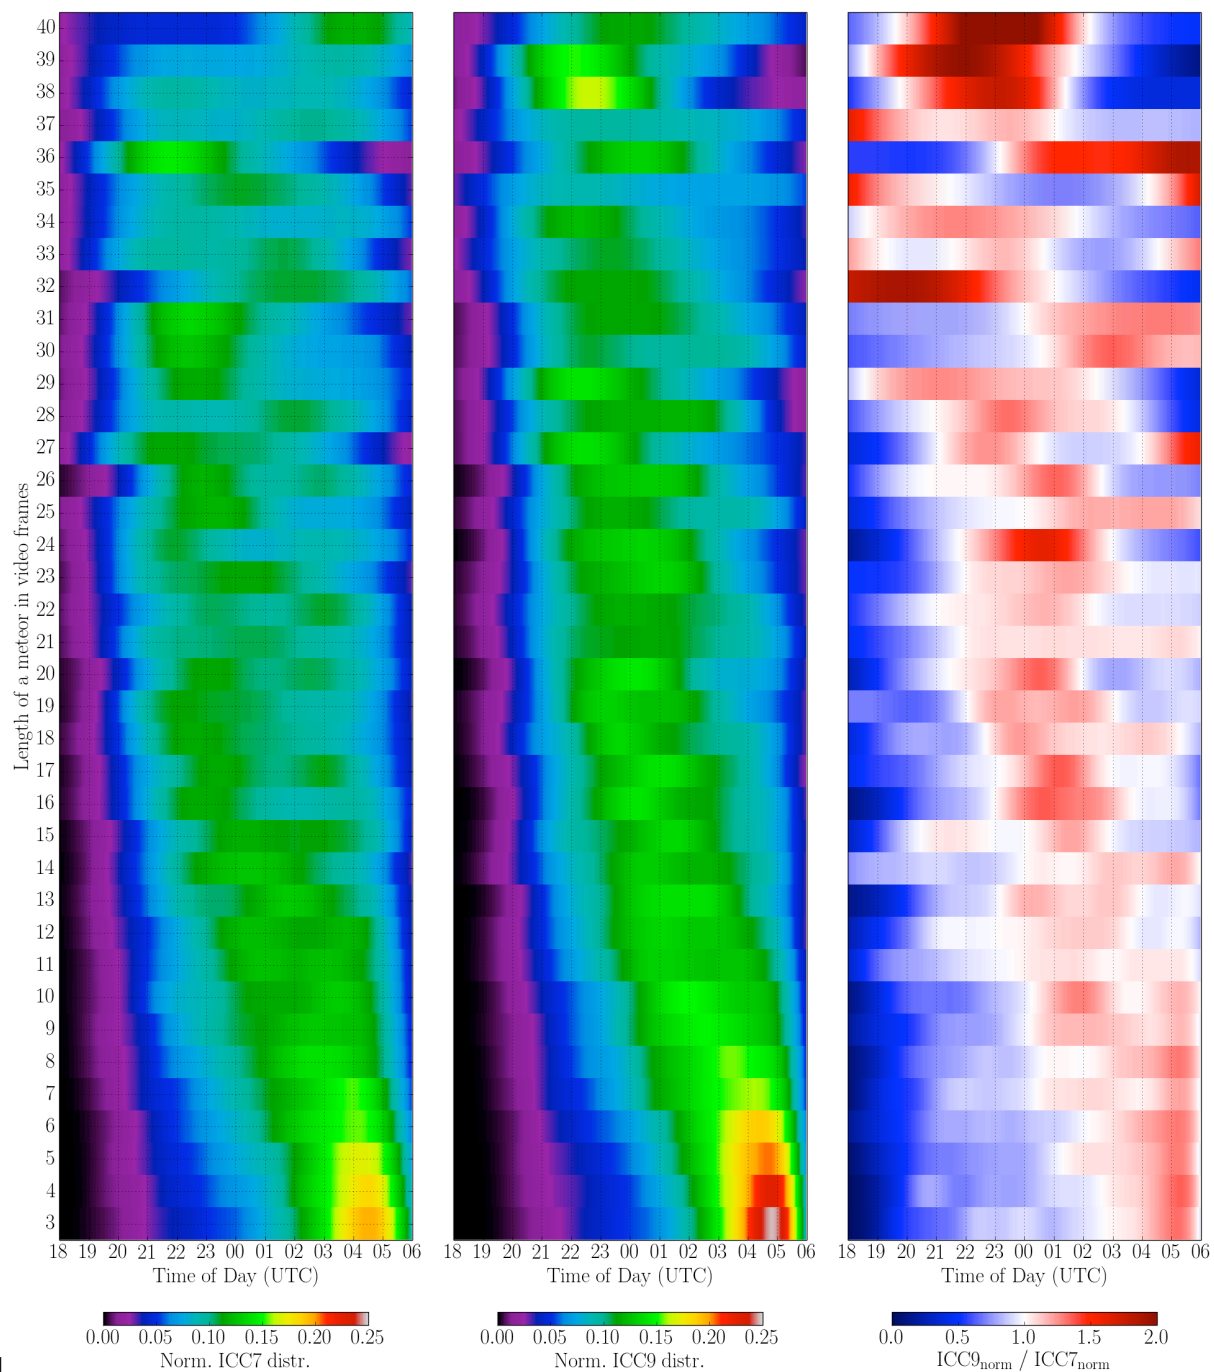

1

2 **Figure 22 - Ratio plot of the distribution of the normalized length of a meteor in frames of ICC9 divided**  
 3 **by ICC7. Each frame distribution is shown vs. the detection time. The ratio is color-coded, with the values**  
 4 **given in the bottom color bar.**

## 56 Conclusion

6 In Section 3.3 we have listed the expected errors and biases coming from the instrument itself,  
 7 from the measurement pipeline, and from statistical sources. Here we map the findings of the  
 8 previous section to these errors.

1 Mechanical/thermal stability: Any mechanical/thermal instability would result in a shift of the  
2 field of view relative to an Earth-fixed direction. This would shift the measured position of a  
3 meteor. When visually inspecting the data, MetRec allows to overlay the expected star  
4 positions with the real image. This was done regularly, and such a shift was observed in very  
5 rare cases towards the morning hours. It was typically less than 2 pixels. Since it only occurred  
6 in a few nights, it was not considered in this analysis and would deserve further study.

7 Brightness drop-off: The drop-off of brightness towards the edges of the optical system  
8 results in a loss of about 55 %. This will be an important effect when computing flux densities  
9 using the limiting magnitude of the system - the detected meteor numbers really are a function  
10 of the position in the field of view. The drop-off is larger than what would be expected from  
11 pure geometrical effects. It is assumed that this is an effect of the image intensifier. For non-  
12 intensified systems, we would expect this effect to be less severe.

13 Astrometric accuracy: The measurement accuracy of meteor positions (astrometry) is  
14 influenced by a number of the listed errors. Figure 4 shows the deviation between measured  
15 star positions and the expected position as determined by the 3rd-order polynomial plate fit  
16 performed by the detection software. It is below 0.2' up to a distance of about 90 % of the  
17 diameter of the field of view. When analyzing the goodness-of-fit of individual measurement  
18 points relative to the fitted great circle of the meteor's path, errors are larger. Figure 5 and  
19 Figure 6 show that typical errors are around 1' to 1.5', depending on the length of the meteor.  
20 We assume that these deviations come from the fact that MetRec determines the position of a  
21 meteor in a single frame by finding the photometric center of the object. The resulting errors  
22 are listed under algorithmic errors in Section 3.3: a possible wake will shift the photometric  
23 center to the back; blooming will shift the center in an arbitrary direction; similar for  
24 distortion of the meteor image. The possible rescaling from physical pixels to the PAL format  
25 (Section 3.3.3 (e)) will also contribute to this result. As can be seen in Figure 4, the deviation  
26 of the expected star positions to the real positions, based on the 3rd-order polynomial fit, stays  
27 around or below 0.2' until about 175 pixels distance to the center of the field of view. For  
28 larger values the deviation starts to increase linearly. One of the possible reasons for this  
29 could be that the 3rd order is not enough. We did not check whether a 4th order fit would  
30 produce a better result; this will be future work.

31 We conclude that for our camera systems a typical error of 1' to 1.5' should be assumed.

1The position measurement inaccuracies will also affect the velocity determination. In  
2addition, the first and last frame of the meteor should not be used for velocity determination,  
3for the obvious reason that it is not known at what time during the 40 ms exposure the meteor  
4appears or disappears.

5In a future work we will determine possible effects of daily, weekly or seasonal temperature  
6fluctuations. Scientific projects that will derive e.g. flux densities from the CILBO camera  
7system will need to consider bias effects that have been shown in this work to un-bias and  
8derive proper scientific conclusions from the observations.

9We did not do a detailed analysis of random noise affecting the measurements. We assume  
10that since the noise is random it does not produce any bias or shift in any of the  
11measurements, it will only increase the scatter of the data.

12We find that a major contribution to the detected brightness distribution comes from the  
13pointing direction of the cameras. The pointing direction has to be taken into account when  
14interpreting the detected number of meteors.

## 157 **Literature**

16Albin, T., Koschny, D., Drolshagen, G., Soja, R., Srama, R., Poppe, B. (2015), Influence of  
17the pointing direction and detector sensitivity variations on the detection rate of a double  
18station meteor camera. In Rault J.-L. and Roggemans P., editors, Proceedings of the  
19International Meteor Conference, Mistelbach, Austria, 27-30 August 2015. IMO, pages 226 –  
20232.

21Albin, T., Koschny, D., Drolshagen, G., Soja, R., Poppe, B., Srama, R. (2015), Influence of  
22the pointing direction and detector sensitivity variations on the detection rate of a double  
23station meteor camera. In Rault J.-L. and Roggemans P., editors, Proceedings of the  
24International Meteor Conference, Mistelbach, Austria, 27-30 August 2015. IMO, pages 214 –  
25219.

26Albin, T., Koschny, D., Soja, R., Srama, R., Poppe, B. (2016), A Monte-Carlo based  
27extension of the Meteor Orbit and Trajectory Software (MOTS) for computations of orbital  
28elements. In Roggemans, A. and Roggemans, P., editors, Proceedings of the International  
29Meteor Conference, Egmond, The Netherlands, 2-5 June 2016. IMO, pages 20 – 25.

30Barentsen, G., Koschny, D., The IMO Virtual Meteor Observatory (VMO): Architectural  
31design (2008), Earth, Moon, and Planets, Volume 102, Issue 1-4, pages 247-252.

1Cooke, W., Moser, D.E. (2012), The status of the NASA All-Sky Fireball network, in:  
2Gyssens, M., Roggemans, P., editors, Proceedings of the International Meteor Conference,  
3Sibiu, Romania, 15-18 September 2011, IMO, pages 9-12.

4Drolshagen, E., Ott, T., Koschny, D., Drolshagen, G., Poppe, B. (2014), Meteor velocity  
5distribution from CILBO double station video camera data. In: Rault J.-L., and Roggemans P.,  
6editors, Proceedings of the International Meteor Conference, Giron, France, 18–21 September  
72014. IMO, pages 16-22.

8Jenniskens, P. Gural, P.S., Dynneson, L., Grigsby, B.J., Newman, K.E., Borden, M., Koop,  
9M., Holman, D. (2011), CAMS: Cameras for Allsky Meteor Surveillance to establish minor  
10meteor showers. *Icarus* Vol. 216, pp. 40-61.

11Koschny D., Bettonvil F., Licandro J., van der Luit C., McAuliffe J., Smit H., Svendhem H.,  
12de Wit F., Witasse O. and Zender J. (2013). “A double-station meteor camera setup in the  
13Canary Islands - CILBO”. *Geoscientific Instrumentation Methods and Data Systems*, **2**, 339–  
14348.

15Kretschmer, J., Drolshagen, S., Koschny, D., Drolshagen, G., Poppe, B. (2015), De-biasing  
16CILBO meteor observational data to mass fluxes. In Rault J.-L. and Roggemans P., editors,  
17Proceedings of the International Meteor Conference, Mistelbach, Austria, 27-30 August 2015.  
18IMO, pages 209-213.

19Molau, S. (1999), The meteor detection software MetRec (1999), in Arlt, R. and Knöfel A.,  
20editors, Proceedings of the International Meteor Conference, Stará Lesná 20-23 August 1998,  
21IMO, pages 9-16.

22Molau, S. (2014), MetRec - Meteor Recognition Software Version 5.2. Available at  
23<http://www.metrec.org/download/readme.txt>.

24Molau, S., Kac, J., Crivello, S., Stomeo, E., Barentsen, G., Goncalves, R., Saraiva, C.,  
25Maciewski, M., Maslov, M. (2015), Results of the IMO Video Meteor Network - April 2015.  
26WGN, *Journal of the International Meteor Organization*, vol. 43, no. 4, p. 115-120.

27Ott T., Drolshagen E., Koschny D., Drolshagen G., and Poppe B. (2014). “Meteoroid flux  
28determination using image intensified video camera data from the CILBO double station”. In  
29Rault J.-L., and Roggemans P., editors, Proceedings of the International Meteor Conference,  
30Giron, France, 18–21 September 2014. IMO, pages 23-29.

1Pedregosa, F., Varoquaux, G., Gramfort, A., Michel, V., Thirion, B., Grisel, O., Blondel, M.,  
2Prettenhofer, P., Weiss, R., Dubourg, V., Vanderplas, J., Passos, A., Cournapeau, D., Brucher,  
3M., Perrot, M. and Duchesnay, E. (2011). “Scikit-learn: Machine Learning in Python”.  
4Journal of Machine Learning Research, Vol 12, p. 2825-2830.

5SonotaCo, T., Molau, S., Koschny, D. (2010), Amateur contributions to meteor astronomy,  
6Europea Planetary Science Congress 2010, held 20-24 September in Rome, Italy, p. 798  
7(abstract).

8Weryk, R. J., Campbell-Brown, M.D., Wiegert, P.A., Brown, P.G., Krzeminski, Z., Musci, R.  
9(2013), The Canadian Automated Meteor Observatory (CAMO): System overview. Icarus,  
10Vol. 225, Iss. 1, p. 614-622.

#### 119. Acknowledgements

12We acknowledge the non-tiring effort of Hans Smit and Cornelis van der Luijt (ESA/Space  
13Science Office) of keeping the cameras operational. CILBO hardware and maintenance are  
14funded thanks to the research faculty of ESA/Space Science Office. We also acknowledge the  
15Instituto de Astrofisica de Canarias (J. Licandro) which hosts the CILBO system and provides  
16local support.
